# Supplementary material for: Metagenomics of Virus Diversities in Solid-State Brewing Process of Traditional Chinese Vinegar
Source: MDPI journal article supplement (doi:10.3390/foods11203296), 2022-10-21
Supplement: s1 [file s1]

The raw sequencing data of bacterial and viral metagenomes of vinegar *Pei* samples in this study were deposited in the NCBI SRA database under the accession numbers listed in the table below.

| Sample name     | SRA ID      | Sample name | SRA ID      |
|-----------------|-------------|-------------|-------------|
| 0d-bacterial-1  | SRR21774940 | 0d-viral-1  | SRR21774936 |
| 0d-bacterial-2  | SRR21774939 | 0d-viral-2  | SRR21774935 |
| 0d-bacterial-3  | SRR21774928 | 0d-viral-3  | SRR21774934 |
| 8d-bacterial-1  | SRR21774923 | 8d-viral-1  | SRR21774933 |
| 8d-bacterial-2  | SRR21774922 | 8d-viral-2  | SRR21774932 |
| 8d-bacterial-3  | SRR21774921 | 8d-viral-3  | SRR21774931 |
| 12d-bacterial-1 | SRR21774920 | 12d-viral-1 | SRR21774930 |
| 12d-bacterial-2 | SRR21774919 | 12d-viral-2 | SRR21774929 |
| 12d-bacterial-3 | SRR21774918 | 12d-viral-3 | SRR21774927 |
| 18d-bacterial-1 | SRR21774917 | 18d-viral-1 | SRR21774926 |
| 18d-bacterial-2 | SRR21774938 | 18d-viral-2 | SRR21774925 |
| 18d-bacterial-3 | SRR21774937 | 18d-viral-3 | SRR21774924 |
