# Supplementary material for: Metagenomics of Virus Diversities in Solid-State Brewing Process of Traditional Chinese Vinegar
Source: MDPI journal article supplement (doi:10.3390/foods11203296), 2022-10-21
Supplement: s1 [file s1]

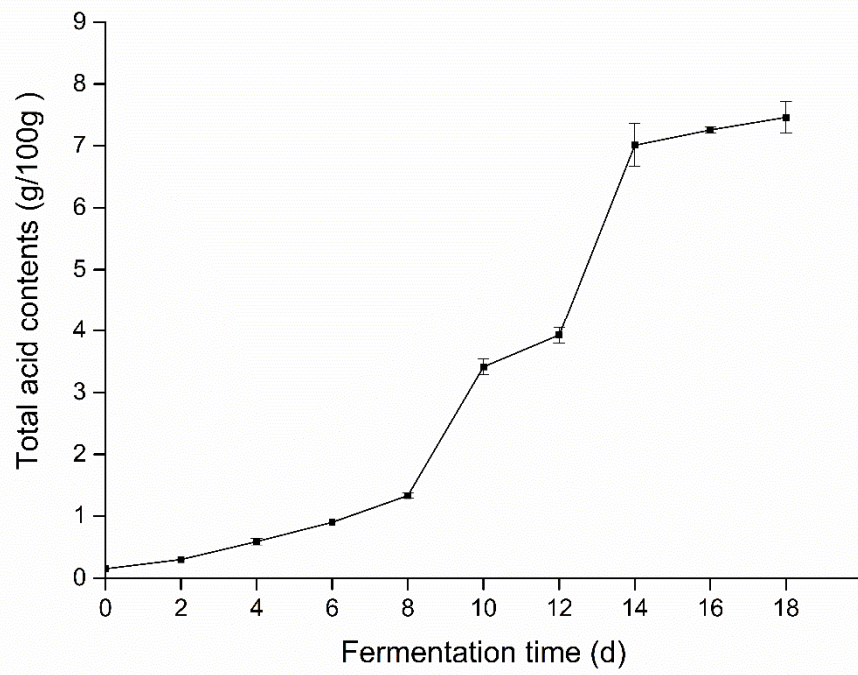

**Figure S1.** Changes of total acid contents in vinegar *Pei* during the acetic acid fermentation process of traditional Chinese vinegar.
