# Supplementary material for: Metagenomics of Virus Diversities in Solid-State Brewing Process of Traditional Chinese Vinegar
Source: Foods. 2022 Oct 21;11(20):3296. doi: 10.3390/foods11203296 (PMC9602057; doi:10.3390/foods11203296)
Supplement: Supplementary file 1 [file foods-11-03296-s001.zip › Supplementary file S1.xls]

family	0d-1	0d-2	0d-3	8d-1	8d-2	8d-3	12d-1	12d-2	12d-3	18d-1	18d-2	18d-3
Abitibacteriaceae	0	0	0	0.103327489	0	0.106579218	0.125384525	0	0.333522715	0.163682745	0.323718768	0.138496136
Acaryochloridaceae	0	0	1.775715574	0	0	0	0	0	0	0	0	0
Acetobacteraceae	4466.55207	4146.366059	4672.543368	475221.7231	476612.6991	477395.1555	510888.239	456924.5849	507011.6783	577563.0385	606815.4892	583596.4997
Acholeplasmataceae	3.267320969	7.55247827	3.255667932	0.787036145	1.443277705	1.123814079	0.731540413	0	2.282620975	0.657738886	1.123276725	0.613486009
Acidaminococcaceae	14.46401413	11.91737641	11.29879262	5.237985633	5.476978391	5.405411325	1.419073355	0	3.667191465	0.839177465	1.116877252	0.383158737
Acidiferrobacteraceae	0	0.36932792	2.702175874	1.03684288	0.477464339	0.156817	0.276729723	0	0.557790663	0.7225115	0.317539115	0
Acidimicrobiaceae	0	0	0	0.486075794	0	0	0	0	0	0	0	0
Acidithiobacillaceae	6.220733888	5.359092943	3.223346208	25.19708812	30.20736745	29.67658715	73.75270787	2.991324762	57.31756964	1937.850856	1502.624639	1394.96162
Acidobacteriaceae	13.44799466	8.331126565	11.32773381	26.97625263	23.04552906	24.16143492	30.29010601	1.676938467	22.71769877	14.46924414	12.75367251	11.0522626
Acidothermaceae	0	0	0.130021015	0.469297027	0.181396494	0.558537536	0.087611781	0	0.116523626	0.285931155	0	0.096773451
Actinomycetaceae	2.656463732	3.870316835	1.087919431	30.52426055	28.15896268	30.83781683	32.56771267	0.995589163	30.7364115	25.2262787	28.84389032	22.18638259
Actinopolysporaceae	0	0	0	0	0	0	0.227600171	1.720637792	0	0	0	0
Aerococcaceae	20128.19934	19852.13321	20367.70449	730.3353322	625.3722787	631.9433058	94.43576478	7.319497102	390.0168935	18.64439348	30.68566647	34.54785889
Aeromonadaceae	17.5767983	20.97325913	26.26419613	81.42257634	79.92149612	75.24780359	57.1636834	10.44027942	73.78680357	82.49173684	77.08666371	68.4626891
Akkermansiaceae	0	2.068236351	1.621305524	5.845097845	6.065549271	5.333760305	1.311725504	1.582986769	5.620278568	1.003119941	1.184403218	1.414068922
Alcaligenaceae	88.11799438	74.9683405	61.4084662	1773.112417	1945.022954	1855.469238	1858.466566	8551.839972	1714.958341	1054.435968	974.7282343	960.176043
Alcanivoracaceae	36.1363586	29.99665846	45.89289107	10.50870721	8.722417018	8.654500921	5.560444635	4.718720598	8.460233887	5.82350527	3.164938346	2.083536923
Alicyclobacillaceae	4.13674936	4.866346448	1.488623835	1.408237613	1.421117313	1.801923136	1.407473756	4.345453875	1.509920808	0.684667566	0.637270592	0.315702333
Alteromonadaceae	24.70696035	27.91267625	18.06642312	57.22730838	61.60882675	71.94406835	45.91173076	13.69360525	56.65807346	65.94936724	55.13246235	47.32982214
Amoebophilaceae	14.00733947	14.64919457	8.208219291	1.073717048	0.960378188	1.248521247	0.303458172	0	1.160262034	0.800769782	0.67649124	0.319957695
Anaerolineaceae	4.410385754	9.751366652	4.64584451	3.294847396	3.790631894	4.195596141	1.542014828	0.401773292	3.010758596	1.309425912	1.028960939	0.963212925
Anaeromyxobacteraceae	22.80910668	29.37078264	33.20065727	4.462473926	5.672060915	6.400755303	2.86487899	0	6.005418664	1.645624313	1.745673923	1.759203352
Anaplasmataceae	53.96308611	51.81750926	60.15277354	7.211989262	6.722759096	7.368967368	4.273911957	5.765949717	6.883385316	0.809697497	2.883299082	2.326227972
Aphanizomenonaceae	0.765755604	0.228699212	2.226198197	5.365443782	8.429628822	7.402877184	10.68559089	47.36576362	6.33620544	3.958531979	4.76933527	5.698125661
Aphanothecaceae	30.36467421	38.52188545	28.43403531	11.80417843	13.03510099	13.76225287	4.20191443	0	13.65043654	4.742964628	2.57967422	2.567924163
Aquificaceae	0	0	0	0.733950877	0.93514126	1.16164672	0.31732495	0	0.700589768	0.338304683	0.730062462	0.289753282
Archangiaceae	22.56708453	29.62242151	28.75371041	145.8611645	162.4133929	145.3470514	166.3560376	40.03200799	143.8694449	87.04828047	98.67763357	86.24693255
Ardenticatenaceae	1.015667206	1.867909793	1.745787784	5.467330615	3.852171969	2.861281631	2.165201409	0	3.240650222	0.634674668	1.265721844	1.076611323
Atopobiaceae	0	0	0	0.238557936	0.099893461	0.571905391	0.096494082	0	0.594218268	0.500420134	0.332172253	0.106584584
Aurantimonadaceae	57.18139649	52.2728077	38.9174117	579.0679335	782.0647431	843.0297425	457.1902282	55.67494846	636.8967982	206.0772433	277.3207219	241.4067136
Azonexaceae	0	0	1.140866212	4.435754561	5.75769628	3.264182592	4.158302515	6.280722372	5.866611816	0.804730192	0.962322144	1.427181821
Bacillaceae	759.0093265	807.6119845	887.264356	732.5506295	892.5521437	752.4307742	573.6856832	14173.3601	755.7856031	358.787322	313.576807	277.2909958
Bacteriovoracaceae	0	0	0	0.079887457	0	0.082401525	0.096940814	0	0.085954156	0	0	0
Bacteroidaceae	8.762308302	7.193945206	8.228352542	28.58115518	29.73203509	32.45888666	30.05542813	15.25046352	26.70380548	16.07758975	14.4028514	15.78628224
Balneatrichaceae	0	0	0	0	0.267615815	0	0.258508836	0	0	0	0	0
Balneolaceae	1.900847095	1.038633975	1.203965846	0.497261737	0.426878821	1.017606478	0.866840289	0	0.995820818	0.927539449	0.655349359	0.315434078
Bartonellaceae	0	0	0	9.755232399	7.856318473	6.449631611	5.859849391	667.4497337	6.466876797	1.00186463	0.935446581	0.763965474
Bdellovibrionaceae	1.030688204	0.567793897	1.37348166	3.104730681	3.538305241	3.563090009	1.850754171	0	4.145171035	1.464912839	2.277568754	1.382921118
Beijerinckiaceae	0.339807951	0.162463921	0	71.98730854	51.67095568	59.12573778	30.55446783	22.03824876	45.40078761	300.3900358	187.2140173	261.8624784
Bernardetiaceae	0	0	0	0.354568987	0.148471788	0.447000055	0.095612857	0	0.211941756	0.187226153	0.164569358	0
Beutenbergiaceae	0	0	0	0.205424889	0.258058107	0.19405734	0	0	0.110512487	0.162708443	0.107263957	0
Bifidobacteriaceae	311.0051882	278.7792895	295.1483161	23.66705611	24.3687575	23.50769735	15.09927844	9.340226342	20.54845391	5.344789921	7.829291086	5.766550387
Bogoriellaceae	0	0.164259102	0	5.973284032	5.405587232	6.65036824	4.099614859	0	5.366367607	2.13778403	2.858706674	2.414631329
Brachyspiraceae	0	0	0	1.422418494	1.995963524	2.549912572	0.732350516	0	1.238095053	0.861490891	0.430025827	1.415702396
Bradymonadaceae	0.531494487	0.508220471	1.178779786	1.644020536	0.902571426	0.600048742	0.617050601	0	0.581885972	0.566596643	0.627823263	0.340788162
Bradyrhizobiaceae	10007.55357	10276.49451	11436.00011	803.5108783	817.477683	798.096782	581.1481313	181.7968885	708.5458768	499.5545254	494.7025441	505.5978643
Brevibacteriaceae	0.832488875	1.529402334	0	2.209644132	1.714936815	1.718678859	1.133097042	0.688255117	2.567689975	0.724981399	1.060792584	0.588259772
Brucellaceae	15.77029991	14.94353303	10.55924924	455.5061219	453.8532894	474.0958648	400.0849198	132.5632885	436.3241078	860.9381174	743.6164888	826.1619915
Budviciaceae	0	0	0	5.008984916	6.63761079	5.605723613	2.390161443	0	6.012533532	2.49434835	0.804379698	1.169266963
Burkholderiaceae	2251.144792	2259.143256	2320.280953	3217.755527	3577.24616	3332.067939	3015.048902	19955.43542	3100.350438	1965.021027	1762.055003	1773.513711
Caldicoprobacteraceae	0.937460125	0.29880299	1.561558922	0	0.10892905	0.089440852	0	0	0	0	0	0
Caldilineaceae	0.956690077	2.635591889	0.842437131	2.452043821	3.149581001	2.243363157	2.600334406	0	2.118034215	1.676869527	1.608062032	1.226955648
Calditrichaceae	0	0	0	0.392174788	0.492656386	0.13483886	0.158630422	0	0.140652256	0	0	0.350437192
Campylobacteraceae	0.359450029	2.062258789	0.72918956	2.628421342	2.426714588	1.71412023	1.543074756	4.102774471	1.911061918	1.347323086	2.127774468	0.591256115
Candidatus_Actinomarinaceae	0	0	0	0.630123536	0.487120921	0.499964311	0.235272087	0	0.10430392	0	0.202475784	0
Candidatus_Brocadiaceae	0	0	0	0	0.650104989	0.43380362	0.470544174	0	0.31291176	0.205526454	0.270982628	0.129937386
Candidatus_Competibacteraceae	0.383857129	0	0	0.716827991	0.766683145	0.599823716	0.824433585	1.558161818	1.140331875	0.337469363	0.889893568	0.246954738
Candidatus_Desulfofervidaceae	0	0	0	2.64769857	2.179157349	1.056673536	0.775526508	7.019077854	2.062899754	0.448740308	0.572074436	0.203339378
Candidatus_Fermentibacteraceae	1.884389545	1.501560482	0.627778233	0	0.109479197	0	0	0	0	0	0	0
Candidatus_Midichloriaceae	0	0	0	1.611960729	1.353421979	0.970741932	0.692496651	0	0.343034822	0.489208569	0.626554206	0.321044853
Candidatus_Nanopelagicaceae	0	0	0	0.128454273	0.32273272	0.264993491	0.415666813	0	0.276418329	0.13565766	0.044715496	0.114783398
Candidatus_Ozemobacteraceae	1.366700109	3.267131598	4.097805171	0	0	0	0	0	0	0	0	0
Candidatus_Paracaedibacteraceae	0	0	0	0.437961692	0.235618272	0.632442164	0.531452176	0	0.282732454	0.138756439	0.365895325	0.352216061
Candidatus_Sumerlaeaceae	1.282161958	1.532520492	0.961083172	0	0.1117365	0.091746028	0	0	0.095701535	0	0	0
Candidatus_Thermochlorobacteriaceae	0.534583773	0	0	0.391285503	1.366521269	1.776913109	0.549940652	0	1.332601507	0.819342632	1.00709695	0.052446383
Cardiobacteriaceae	0.951393148	0.976917842	1.634232138	70.76611231	72.10547444	65.37586368	47.19543536	42.66876982	54.36997312	38.81795878	31.31970176	39.1126359
Carnobacteriaceae	0.777310687	2.477574796	1.035834085	1.667739806	0.887905877	2.094265638	0.651442267	136.9283555	1.348998389	0.690352867	0.615289249	0
Catabacteriaceae	0.401192613	3.45262036	0	0	0	0	0	0	0	0	0	0
Catenulisporaceae	3.343271773	1.278748282	4.009680329	0	0.116542371	0	0	0	0	0	0	0.248697362
Caulobacteraceae	65.61368227	56.16765585	61.4468493	1619.092871	1488.410474	1591.806163	1411.867708	354.0170557	1583.54268	507.8721101	646.4304838	647.9531347
Cellulomonadaceae	5.964465601	9.593525517	7.250720507	3.340724538	2.414774653	1.365242111	2.622094611	0	2.113653399	2.152880571	2.256299693	1.085262309
Cellvibrionaceae	9.775455203	2.521420806	2.529295267	6.203305002	6.048914174	5.241148222	4.277407254	0	4.291747083	1.157780813	0.852082872	1.630427861
Chamaesiphonaceae	2.030525877	0.242701204	2.378190501	0.070431391	0	0.197763661	0.085466187	0	0	0	0	0
Chelatococcaceae	0	0.068504372	0	2.950383213	2.144290136	2.979909765	2.681564495	5.247469951	2.702851143	0.9447587	1.201178486	0.897756707
Chitinophagaceae	6.685373515	4.462409527	4.690510792	10.04631865	6.654856144	6.891224714	5.349790322	23.86578963	6.702216954	2.760578839	2.511915866	3.262439468
Chlamydiaceae	170.8771474	202.2609947	221.6004306	204.0430369	198.0682784	220.5640264	156.1624485	37.93581734	178.6663057	129.1930796	124.1881018	104.8445224
Chlorobiaceae	5.688779145	6.425957019	2.485408628	2.80725956	3.595697831	3.673027857	2.449539158	3.315155536	2.666277489	1.724659689	1.370050741	1.679384638
Chloroflexaceae	0.578463767	0.553132978	2.02348984	0.216130607	0.170684102	0.233579127	0.329751429	0	0.378733436	0.28698182	0.094594986	0.182116966
Chromatiaceae	5.160073166	3.8759475	1.788347853	63.396678	61.11690187	57.92058684	59.9218604	34.6419038	56.203135	29.84678261	29.96731637	28.14781837
Chromobacteriaceae	4.372756809	3.577011377	6.914716404	406.4193208	521.680107	392.6224658	315.0162433	9640.056706	399.7018089	155.6477684	123.5817023	112.6021729
Chroococcaceae	0.921257111	0	0.460370704	0.546560338	0.84716753	0.885909612	0.284242747	0	0.336037969	0.247375732	0.57078015	0
Chroococcidiopsidaceae	0	0.415816749	0.8692314	0	0	0	0	0	0	0	0	0
Chrysiogenaceae	2.981465649	3.12242303	4.824432724	1.812241487	2.128095624	2.153727538	0.956128572	0	1.865087449	0.249634871	0.617135094	0.211222417
Chthoniobacteraceae	0.420167939	1.607075543	0.419932737	0.621320749	0.384592375	0.449808567	0.262714135	8.197894525	0.312977121	0	0.251001412	0.148738615
Chthonomonadaceae	0	0	0	0.073428471	0.461210234	0.279561196	0	0	0.194409401	0	0.076682318	0.24218696
Clostridiaceae	21.79160696	28.74060701	25.40895545	188.5258693	189.4326319	193.6037231	173.0370674	18.94498433	186.6481452	140.2183326	132.4657015	126.3803346
Clostridiales_Family_XIII._Incertae_Sedis	0	0	0	0	0	0	0	3.979575675	0.103721217	0	0	0
Clostridiales_Family_XVI._Incertae_Sedis	84.42091628	84.32211286	86.12163256	6.684473016	3.844083004	4.319423127	0.822566191	0	2.566213788	0.383971047	0.627359411	0.650900587
Clostridiales_Family_XVII._Incertae_Sedis	10.92614407	2.509506715	4.121135638	0.072808821	0	0.101129145	0	0	0.348114333	0	0	0
Cohaesibacteraceae	0	0.535691848	0	2.691008283	5.357772221	2.54297886	2.712409618	2.117828103	2.197533606	0.779859105	1.103263368	0.226753477
Coleofasciculaceae	9.832319003	2.150053062	3.869955839	0.867830058	1.806773427	1.461374535	0.712763461	0	1.157765925	0.863211107	0.506454133	0.326404019
Colwelliaceae	0.308849217	0.486268084	3.592659072	9.402650005	8.000562149	7.92517439	7.65669447	2.806714129	6.324473457	3.758939358	3.077096288	2.781544375
Comamonadaceae	787.8499449	675.4731097	672.7295944	8023.608312	8224.091923	8775.105171	8096.16132	915.8123088	8064.702339	4823.805026	4690.996379	4656.718221
Conexibacteraceae	3.449648602	1.8599975	0.501210041	0.948114873	0.73086387	0.480174515	0.388731694	0	0.408046105	0	0	0.254163238
Coriobacteriaceae	2.487672176	0.517059088	1.621305524	6.64786491	8.847323199	8.814839993	5.536677135	0	9.771429932	2.810795475	4.266816925	3.450247545
Corynebacteriaceae	42.73648096	39.99809332	42.83210093	16.51888637	18.26482379	16.72316426	16.48621592	194.2565389	16.13720756	7.098020245	6.060768292	7.349164594
Coxiellaceae	12.40174733	15.74475864	11.40435011	1.68429787	1.44488664	2.568716939	1.246057173	0	1.155976432	0.583090747	0.896618448	0.62516708
Crenotrichaceae	0	0	0	0.716929597	0.365301969	0.50934361	0.176435363	0	0.156439298	0.123130714	0	0.10418403
Criblamydiaceae	0.330770505	2.214003009	0.661170693	0.663680411	0.71645265	0.304251786	0.268451484	0	0.654151927	0.233632636	0.231030061	0.098841259
Crocinitomicaceae	9.164876735	7.484701454	5.252941054	2.615922133	2.051393227	2.223814697	2.23036479	5.72791265	2.084407374	1.50184807	0.990362089	0.899604776
Cryomorphaceae	0	0	0	0.217142616	0.256531136	0.490957064	0	0	0.343491119	0	0.060067816	0.038548091
Cryptosporangiaceae	0	2.237809493	1.524284557	1.412292461	1.403747967	1.680551176	0.942704364	0	1.091348718	0.713652292	1.141031572	0.484952794
Cyanobacteriaceae	1.627875785	0.622636598	0	0	0	0.093187065	0.343265832	0	0	0	0	0
Cyanothecaceae	58.69855786	56.86697564	61.67119835	2.059505393	2.541680953	3.161863798	1.013284281	0	1.574648986	0.336534615	0.133522145	0.500146884
Cyclobacteriaceae	6.539843	13.26310152	12.35900888	4.434420616	3.232287327	4.887541406	2.046191504	0	3.464303465	2.013311336	1.683201871	1.756684258
Cytophagaceae	157.649359	158.2770989	133.6099189	7.571133773	7.612601774	6.877557506	2.201433997	126.9434498	4.421055442	1.724662789	1.710308716	2.478505977
Deferribacteraceae	0	0	0	0.439946788	0.12281519	0.20168532	0.118635783	4.101001991	0.210380711	0.077436313	0.255245676	0.196562504
Dehalococcoidaceae	0	0	0	0	0	0.306874646	0	0	0	0	0	0
Deinococcaceae	12.98722796	8.286786282	8.798854912	3.642334845	5.634893907	7.030565805	5.608494825	0.669214509	4.905947556	2.407028001	1.695875979	1.813163372
Demequinaceae	0.616818188	2.476988402	1.046668129	2.85290497	1.875239559	3.290041429	2.755289204	0	2.792798352	0.287737036	1.128456409	0.392014486
Dermabacteraceae	55.40645111	50.89195069	57.72451694	6.267130045	6.970925363	7.168725292	3.838837518	0.620531576	4.088859039	1.056400789	1.252477235	1.970481725
Dermacoccaceae	4.477377629	6.299431074	3.19289805	3.139248523	4.645495941	4.104092338	2.461453088	0	2.929926136	2.79589366	0.577926545	2.869322786
Dermatophilaceae	5.734499598	0.817718294	2.345284721	1.832197596	1.875342922	2.681463052	1.405654514	4.480151232	2.648082719	0.545680405	0.15016954	0.981791347
Dermocarpellaceae	8.577221376	7.518158	7.143683344	5.950238166	3.737393276	5.932909823	1.203403203	0	4.054665034	0.942586841	1.035651997	1.329244522
Desertifilaceae	4.244582221	4.46142956	0.731177001	0.082960051	0.52107887	0.960406556	0.302007919	0	0.287732511	0.131418358	0.433181364	0.555982084
Desulfarculaceae	2.132052171	1.359126745	1.775715574	0.207277433	0.261167241	0.101707026	0.377664233	0	0.111174238	0	0.323718768	0.13933045
Desulfobacteraceae	4.911494714	4.322670609	9.454804506	11.14960596	10.12306517	9.859042024	5.87146931	2.518388041	9.04317759	5.666630239	3.801867464	2.931352511
Desulfobulbaceae	0.851847328	0.219416218	1.002420082	1.244495441	2.062608717	2.213056862	0.743204472	0.743186276	2.085879754	0.389076025	0.754928351	0.845491541
Desulfohalobiaceae	0	0	0	0.649116891	0.475668235	0.613749292	0.459481223	0	0.407406534	0.342758851	0.169470327	0.145008493
Desulfomicrobiaceae	0.194327672	0	0	4.91222266	5.828887496	6.519137817	5.498621431	0	4.76032537	2.477236043	1.803822207	2.818829164
Desulfonatronaceae	0	0	0	0.055484536	0.069700582	0.057230641	0	0	0.238792254	0	0	0.131413947
Desulfovibrionaceae	1.189710504	1.177461289	4.414309536	3.833419942	4.377160848	4.141743992	3.474416513	9.98656566	4.506213149	41.01077987	34.05574562	35.86070489
Desulfurellaceae	9.241356086	14.01287736	10.28329766	1.430872098	0.775926041	2.270712507	0.686280025	0	1.16167189	0.302034338	0.462355734	0.688683559
Desulfurobacteriaceae	0	0	0	0.318370677	0.239965472	0.45974578	0.154532957	0	0.548076687	0.30260168	0	0.341385309
Desulfuromonadaceae	0	2.258042852	2.232059318	1.995096039	1.518470946	1.188880578	1.087547921	0	1.214695685	0.430906378	0.871138121	1.262255813
Dietziaceae	0	0	0.774556532	1.261403561	2.375686184	1.368206269	1.287332455	0	1.560908109	1.72388396	0.94220263	0.340903972
Dysgonamonadaceae	0.714768448	2.733875636	1.428736669	0.733401448	0	0.275949294	0.081159751	1.708259103	0.723151689	0	0	0.089646724
Ectothiorhodospiraceae	6.921417776	4.824616196	3.979250078	10.23156913	16.88931388	13.92973631	10.32338113	3.116115686	10.90484394	5.381456176	7.056776937	4.008046481
Eggerthellaceae	0.347401424	0.332188799	0	1.060405573	2.300897984	2.485856071	3.275408046	9.727851651	1.452097034	1.0689672	2.013446341	1.808960701
Endozoicomonadaceae	6.410402553	3.772505509	1.779749233	2.771028383	1.098440481	2.471038741	1.736398612	0	1.073076706	1.021144409	0.955244762	0.64863542
Enterobacteriaceae	36815.28145	38133.81649	40434.2211	4380.076862	4502.276452	4244.109838	3441.147736	3256.937207	3767.356653	3427.844823	2974.630161	2956.136047
Enterococcaceae	288.388743	292.1748112	268.0039888	85.35564559	92.49158205	86.33810817	87.64578914	19.35878796	78.57282457	51.88924853	61.79713418	48.95809863
Erwiniaceae	2846.953106	2568.499522	2273.950766	15048.55341	15808.73862	14808.36595	12190.50466	7468.393283	13352.51766	7115.655768	6516.5807	4997.963796
Erysipelotrichaceae	7.978242322	13.45124318	13.63706999	308.312738	348.9329688	325.2309233	387.2133924	100.0397647	304.6629449	213.4149214	211.1907689	206.9706811
Erythrobacteraceae	16.19371617	13.14556354	11.59864211	361.2802541	359.7212252	376.1971123	293.2864527	36.8100195	328.1645022	137.7931034	143.1834141	128.1111717
Eubacteriaceae	0	0	0	2.180322279	1.766722153	1.626525168	2.63129125	0	2.142052935	1.065901519	0.879355245	0.145464495
Euzebyaceae	1.504472298	0	1.002420082	0	0	0	0	0	0	0	0	0
Fastidiosibacteraceae	0	0	0	0.302731415	0	0	0.183677331	0	0.081430253	0.239780863	0.316146399	0
Ferrimonadaceae	0	0	0	0	0.247735783	0.101707026	0.119652661	0	0.530459937	0.31240021	0.102973399	0.132164884
Ferrovaceae	0.365793265	0.765630597	0	21.75651082	29.3334984	25.19428091	23.43864991	1.010417086	28.89177913	27.10446108	27.56796495	25.22943171
Fervidobacteriaceae	0	0	0	0.246509867	0.557405511	0.152560538	0.179478992	0	0.371321956	0.234300158	0.102973399	0.198247326
Fibrobacteraceae	0	0	0	1.891142845	1.94328703	0.945955992	0.713734154	0	1.057109559	0.900875066	1.187846813	0.695004312
Flammeovirgaceae	7.358705042	9.367198664	3.518582299	13.81602362	12.49564636	18.58037157	14.17436395	0.476803244	15.51544519	10.37699275	10.86420397	6.517480861
Flavobacteriaceae	838.948087	749.8631444	773.0173411	205.6150969	218.112605	206.7834821	154.3166186	156.8343408	179.5044962	105.3081925	113.8961557	117.5178191
Francisellaceae	5107.24702	4984.522382	4920.444539	228.8792673	213.0133268	203.3601034	19.77669046	2.783234525	120.4492458	6.052387481	8.284737424	5.763568975
Frankiaceae	30.001043	33.68549088	37.82428747	9.366534915	10.38798261	8.508160119	6.5179758	1.978733461	8.545508375	2.65684665	2.855368738	2.949796885
Fusobacteriaceae	0.131747574	0.125978379	0	0.435759678	1.470326454	1.60334722	0.255160219	2.59119858	0.705752754	0.971966646	0.597770265	0.388068032
Gallionellaceae	0.314064924	2.337431627	2.972659948	8.513826403	8.296163566	7.797003787	4.177998399	145.8299455	6.690465408	1.305437293	1.648560227	0.437296411
Geminicoccaceae	1.120447837	3.419901242	0	2.673486374	3.262785523	4.194503186	1.802957614	0	3.247648853	1.363385063	0.880938823	0.881088208
Gemmataceae	2.163690522	5.696356919	2.254146713	4.687712258	5.079723429	4.523085638	6.994512013	5.230336399	5.918550178	113.4310017	109.1988983	119.0396296
Gemmatimonadaceae	1.881233113	2.991048116	1.561558922	3.045121885	2.404058822	2.780913428	2.705516953	0	1.721482646	1.071961506	0.588900155	0.453506955
Geobacteraceae	1.967415263	2.649324412	2.550583264	4.618328425	5.410074348	4.743551146	3.44089442	2.731008704	5.487563306	3.144538901	1.844624845	3.212302338
Geodermatophilaceae	7.14509099	9.548560217	6.585988974	18.15172543	16.04605616	20.40922504	12.86797333	3.038089485	17.27930917	7.00925362	8.85180837	8.30029235
Gloeobacteraceae	0.398620865	3.392371643	2.350546577	1.092553329	0.773767201	0.853349674	0.450325758	0	0.385403628	0.853264552	0.723231538	0.311705452
Glycomycetaceae	3.345536573	7.072567013	1.866050794	5.002685781	6.366357299	5.836590559	5.052827885	0.442175075	6.309145652	2.719952287	2.539752945	2.78615857
Gomontiellaceae	0.942194772	0.900936289	0.94166735	0.862784534	0	0.246080919	0	0	0.116038111	0	0	0
Gordoniaceae	0.610468342	0	0.629829952	12.7519474	15.55353404	14.46439807	13.87015133	3.165973537	15.89314432	7.456386601	7.920028521	5.261366202
Granulosicoccaceae	1.461005618	0	0.505284919	5.67818511	5.550480519	4.421430856	4.289120046	0.894342807	4.283111161	3.821327845	2.648871814	3.421362202
Hafniaceae	0	0	0	3.178521439	3.937285676	5.024459878	2.873694973	10.30347853	3.98438472	1.500343115	1.600429929	1.613579305
Hahellaceae	0.723079709	2.074248666	2.363465222	2.035440612	1.846856338	2.308356971	2.001163732	0	1.843207932	1.224720727	0.948360702	0.62813344
Halanaerobiaceae	0	0	0	1.190047633	0.622898879	1.227498584	0.601701601	0	0.533508557	0.157097807	0.207130399	0
Halieaceae	3.548028832	4.578877729	4.586525033	11.06775828	12.47978926	14.33050992	16.06932554	5.393194045	13.563362	6.293786075	7.968424892	6.830061914
Halobacteriovoraceae	1.980409394	1.514950193	1.18758048	0.729288563	1.383258723	0.675174049	0.484538701	0	1.336857542	1.091351911	0.501711698	0.166394638
Halobacteroidaceae	0	0	0	0.466352561	0.872268279	1.339485143	0.505942869	0	1.058437841	0.280359163	0.382127093	0.978159245
Halomonadaceae	2574.272998	2471.680411	2405.844257	293.8532088	291.9227223	319.7111528	163.4829845	35.82756902	223.7607986	247.384107	186.6006287	255.6187956
Halothiobacillaceae	0	0.287255049	0	3.95072797	2.852845499	3.471407877	3.127220428	0	2.745931742	1.641354818	2.92639695	1.055014462
Hapalosiphonaceae	66.25676993	57.02570866	61.96845577	1612.717642	1648.751086	1607.444306	1657.735853	191.9510592	1518.763379	854.4130774	885.7531505	815.4135395
Helicobacteraceae	2.038847704	1.949567052	0	4.983353482	6.262153573	6.323077677	2.736748386	3.471462212	3.511493504	2.37581556	2.853387033	1.696483162
Holophagaceae	0	0	0	0.78397782	0.83012767	1.272462422	0.766912017	0	0.764004564	0.533772041	0.254973693	0.934219938
Holosporaceae	0	0	0	0.424320263	0.355358705	0.145891225	0	0	0.152181129	0.448115056	0.295415488	0.379161552
Hungateiclostridiaceae	7.099693775	9.150628124	5.240140066	1.498147023	0.691906899	0.625995613	0.630615728	0	0.801812771	0.950447818	0.256915652	0.352005297
Hydrogenophilaceae	0	0	0	0	0	0	0	0	0	0	0	0
Hydrogenothermaceae	0	0	0	1.852080948	1.197307216	1.41413299	1.285637342	0	0.986652019	0.387638987	1.543666012	0.142770708
Hyellaceae	0	0	0	2.238959536	2.093509348	1.475281841	1.273058121	0.207305758	1.263943515	0.642489817	0.596744734	0.484627652
Hymenobacteraceae	17.03060674	16.52967954	12.94113771	4.642324074	5.593741493	5.135413685	3.155061256	0.226788935	4.79461532	3.367481934	1.703110055	1.558022572
Hyphomicrobiaceae	29.06104114	34.54467974	36.96346713	169.0608503	175.6888559	186.8656059	183.6130454	181.745669	187.3275925	228.1176887	184.2468948	200.631124
Hyphomonadaceae	12.49254692	11.00719164	10.49532398	146.3913679	138.5386039	157.776615	124.9985079	17.59181243	139.3225885	134.7348683	144.7939038	129.2264356
Idiomarinaceae	1.072152672	0	1.607328753	1.903157447	2.304866427	3.852440828	1.408786657	1.536880358	2.618797458	1.314719602	1.626047535	0.447946901
Ignavibacteriaceae	0	0	0	0.52523318	0.226115733	0.677120182	0.265531417	0	0.690778559	0.39288911	0.457034087	0.286847513
Ilumatobacteraceae	2.331932062	0.57174803	0.597596587	0	0	0.393625748	0	0	0	0	0	0
Immundisolibacteraceae	0.787150063	0.376340475	0	32.32711672	32.5153215	32.44325371	46.11928527	1.00189036	36.66216778	68.337546	64.32578758	61.33538046
Intrasporangiaceae	9.377934152	9.013811541	16.82946594	30.78190583	32.55925877	30.39604056	31.71625629	13.8034715	32.83905744	15.89561519	18.96635787	14.4129751
Isosphaeraceae	1.727357083	2.312403142	0.345278028	1.858592788	1.422096478	1.558416824	0.827315781	5.548386612	1.067091293	0.523759867	0.414161884	0.381812156
Jiangellaceae	3.048539547	2.408986901	3.65005843	1.415930696	2.716658929	1.135841404	0.894023285	11.00752389	1.865430698	0.659896154	0.575624402	0.755616846
Jonesiaceae	0	0	0	0	0	0	0	0	0	0	0	0
Kangiellaceae	15.955079	15.59898629	14.79513394	11.93770817	12.52787789	13.36187389	10.48751369	1.664201102	9.559722743	8.941037264	11.18776541	6.267577455
Kiloniellaceae	0	0	0	0.152705227	0	0.31502176	0	4.20261974	0	0.241902818	0	0
Kineosporiaceae	4.686683126	4.902097047	2.429913361	15.92400645	18.17294901	26.09393738	18.66599634	0.668867649	14.91137982	4.707458558	5.245820376	6.326955244
Kofleriaceae	12.03555533	11.76021169	10.83606901	3.10522999	2.910560711	3.198567093	1.452899369	0	2.935384925	0.693904528	1.429427542	1.406426427
Kordiimonadaceae	0	0	0	0.269151153	0.358485091	1.998089416	3.048527504	4.325100461	0.598760277	0.732187993	0.785476219	0.206507631
Kosmotogaceae	2.96118357	1.415757026	0.986508652	0	0	0	0	0	0	0	0	0
Ktedonobacteraceae	4.669010111	4.497147208	2.607821728	1.177779802	0.361688393	1.487076776	0.217444523	0	0.615885586	0.433971596	0.213675318	0.284486704
Labilitrichaceae	1.662696657	0.317977514	0.664706365	1.07740992	0.891346651	1.276737323	0.440035366	0	0.872907405	0.13946438	0.091940534	0.118004361
Lachnospiraceae	4.538574065	2.526310711	1.648550839	9.57123008	8.259963244	7.580824833	5.755874004	29.51668556	5.659922969	2.832263253	3.178839152	1.902838637
Lactobacillaceae	19848.29856	19728.07435	20627.69241	4266.410011	4501.590407	4180.229456	10866.05486	63.36663436	6676.443202	7665.806166	7645.68998	5263.068483
Legionellaceae	3.034200707	6.170099319	2.607964384	9.501192681	12.33887863	9.598480968	7.785832565	0	9.43114591	3.935401135	5.775156584	3.802184623
Lentisphaeraceae	2.75502522	0.376340475	1.573418863	0	0.274390899	0	0	0	0.235013896	0	0	0
Leptolyngbyaceae	9.455355059	10.89486981	11.73893223	5.965381826	6.197143726	5.588433236	1.584535356	0.761051331	4.612159452	1.198703357	2.712585176	1.353561469
Leptospiraceae	5.171957296	1.19669268	5.337099395	7.097520741	8.402134128	6.342357681	4.003208546	0.430159448	6.036419728	2.939649634	2.500024148	2.184700409
Leptotrichiaceae	0	0	0.233646786	0.713581194	0.407460169	0.267650067	0.314875424	0	0.558378881	0.616579362	0.135491314	0.173901163
Leuconostocaceae	1.03489661	0.159843535	3.100241736	105.4094489	102.234067	104.9059649	135.3615468	0.545327284	127.1590274	368.5222202	357.7304258	323.7921433
Lewinellaceae	4.465517862	6.978020335	3.807638723	10.58981183	12.08048916	8.208673339	22.42954559	0	13.71249873	631.7460687	469.8338754	400.446957
Listeriaceae	587.957286	582.1054854	581.5853886	23.36526122	21.62291771	27.64578959	6.349095575	1.856875975	12.74576859	2.595826093	3.269729484	2.501680382
Magnetococcaceae	1.180450922	0	1.702740962	8.241398054	10.11741007	7.498444596	8.338125523	0.30325417	7.398156504	5.551069209	4.275987412	2.33705355
Marinifilaceae	3.992535968	2.95856917	12.15113061	10.26070984	11.39704402	12.66266956	4.763780349	0	7.281097546	3.336218414	3.762489563	4.133682667
Marinilabiliaceae	1.584992488	5.291435798	1.090850914	0.632654484	0.637145235	0.305633922	0.152242351	0	0.091911375	0.40596562	0.089209627	0
Mariprofundaceae	0	0	0	0.389959111	0.734809526	0.97497339	0.591503269	0	0	0	0.101809857	0.130671495
Melioribacteraceae	0	0	0	0.158673018	0.249159552	0.327332956	0.288816769	0	0.042680685	0.125678246	0.207130399	0.106339562
Merismopediaceae	1.913380153	0.914796848	1.91230908	0	0	0.273826607	0.16107089	0	0.285632274	0	0	0
Mesoaciditogaceae	0	0	0	0.293964066	0.332354223	0.363858183	0.142686308	0	0.37954544	0.093134645	0.245592433	0.23641078
Methylacidiphilaceae	0.942194772	0.900936289	0	0.255639862	0.321138978	0.527369762	0.465315905	0	0.275053301	0	0.133484035	0.17132485
Methylobacteriaceae	390.2918931	343.010123	301.2121379	2657.939398	2537.635774	3269.513012	1759.225856	545.4630111	2533.014089	1378.17131	1588.628778	1401.929104
Methylococcaceae	5.992293925	6.034275424	5.791607768	61.05537909	62.52946046	58.46430618	15.32612207	0	42.37103778	66.63350466	58.56717635	60.31837248
Methylocystaceae	6.728062433	2.94466449	4.393249941	53.83912083	65.7687895	59.93514828	44.26041455	29.43263277	54.51203189	19.60900885	23.18581784	16.12222806
Methylophilaceae	0	1.715244089	0.298798294	13.61404074	13.92056631	15.38654858	13.63677739	35.09338213	14.97871778	5.71314051	5.132992294	4.093964273
Microbacteriaceae	1503.686993	1375.682236	1190.783491	7433.891844	7452.704049	7294.535977	6550.751027	468.7546242	7940.771326	2672.314296	3655.32037	2781.820698
Microbulbiferaceae	12.35719373	5.612425924	3.75707387	0.197620881	0.374707643	0.393290725	0	1.907212974	0.051860608	0	0	0
Micrococcaceae	90.12206737	102.3431463	94.83999696	364.0194645	368.1633784	402.6745322	298.8680894	31.13870111	357.1797796	219.9019883	183.2376217	167.3747341
Microcoleaceae	12.75181115	5.856793222	6.762138458	123.2984212	128.2256039	117.8643842	122.1123197	8.641343079	122.7428662	192.5087154	156.1807568	132.2726651
Microcystaceae	3.526950676	8.206630759	6.687848428	0.108526356	0.269319585	0	0.128461446	0	0.233535821	0.167699499	0	0
Micromonosporaceae	45.11299357	41.02156243	38.55650236	50.65952915	49.65372209	48.0655607	43.51987613	7.514862222	46.6796593	21.16898056	19.73626608	20.34251463
Micropepsaceae	1.351844673	0.64632386	0.337771984	0.493019734	0.743207349	0.508535128	0.837568629	0	1.060919873	0.156200105	0.102973399	0.396494652
Microscillaceae	0	0	0	0.119004763	0.597982924	0.490999434	0.722041922	0	0.256084107	0	0.248556479	0.159509343
Microthrixaceae	0.37460756	0	0	1.525583551	2.185049786	2.350338797	1.910732103	0	2.550804919	0.717619082	1.496966618	0.935730635
Moraxellaceae	40640.07577	39566.83999	40021.73035	2418.442616	2294.071873	2311.06449	1053.707964	117454.1922	1631.701486	521.4103873	519.3816199	507.1966553
Morganellaceae	2.368368914	2.443546951	1.791005415	11.26642425	11.78226446	10.17512455	10.231899	88.05605645	11.05631168	40.14474674	33.74714039	33.46855429
Moritellaceae	0	0	0	0	0	0	0	5.182397159	0	0	0	0
Mycobacteriaceae	417.2664901	399.2933876	447.0925261	700.1993984	748.5055504	719.3231294	758.4466465	347.6417002	689.3129319	968.4091606	739.8178298	855.5791129
Mycoplasmataceae	0	0	0	2.598591797	1.328243281	2.804226263	0.775483899	0	1.266139048	1.40250675	1.036740887	0.580895652
Myxococcaceae	114.6673711	109.4180895	108.8830527	11.56109338	10.4898406	9.413303947	3.893499164	0	11.62646565	3.019312571	3.044502806	1.267444726
Nakamurellaceae	0	0	0	2.40360132	2.648626206	3.102409318	1.910208407	148.2765204	2.718437813	0.554922601	2.15254408	0.563505367
Nannocystaceae	3.863773917	9.492119693	3.774556597	11.61692435	14.54990586	12.56611817	13.53222302	0	13.74428592	11.05111077	6.650432438	8.618311209
Natranaerobiaceae	0	0	0	1.820554521	1.193222807	1.469619864	0.960514483	0	0.681324689	0.626949963	0.413310659	0.424382655
Nautiliaceae	0.522561807	0.999357901	2.089077146	0	0	0	0	0	0	0	0	0
Neisseriaceae	38.15086416	32.78590793	27.99124715	114.4708667	123.7016064	125.9370392	135.5819716	101.6635515	113.4582262	86.67650499	78.17144653	94.66215896
Nitriliruptoraceae	0	0	0	0.119004763	0.149495731	0.122749858	0.866450306	0	0.128042054	0.188517368	0.248556479	0
Nitrosomonadaceae	22.38113649	28.32010205	18.86693538	37.66342188	35.07654205	41.24574132	35.19856758	19.03194752	35.89154998	20.94418074	17.76101938	19.58389341
Nitrospinaceae	0	0	0	0.466838288	1.203532227	1.831136835	0.962064708	0	1.57004542	0.238884711	0.487525364	0.202126433
Nitrospiraceae	74.89484155	83.5956733	72.50510427	20.11706894	19.87196115	21.91541045	14.01403982	15.82420715	18.05464558	5.994829856	6.713367467	7.520438386
Nocardiaceae	49.88403325	49.18377418	45.51219474	139.0378255	136.9580146	143.6025189	113.9072724	34.74952466	143.029208	58.54149649	58.04111963	53.99436117
Nocardioidaceae	18.85875551	22.62739974	20.16414444	49.90069204	49.6810773	54.08920385	36.53717262	24.02694137	45.76145198	18.88025795	20.05541618	18.75248566
Nocardiopsaceae	3.325960357	4.799127538	6.501018747	10.38061205	11.4241396	10.48765094	12.12127922	12.84441018	11.33108007	3.220694123	3.967921474	6.551429243
Nostocaceae	18.96897963	21.87246161	15.6898701	149.9550391	157.0522365	153.4887479	134.5781508	8.761717777	135.2439699	56.43757108	63.84145183	54.5135954
Notoacmeibacteraceae	0	0	0	1.27804611	0.291968818	0.920623938	0.12034032	0	1.142335969	0.645223135	0.280235246	0
Oceanospirillaceae	73.76122523	81.2052893	71.12244894	22.18858217	21.59366351	22.04469599	8.50544953	0	16.20665841	4.705703239	4.403964405	4.789896692
Oleiphilaceae	0	0	0	0.822473536	1.576016928	1.149350929	0.47548952	0	0.922765133	0.240026163	0.198739751	0.646211341
Opitutaceae	12.50017577	13.9963084	9.19837184	2.338131808	3.550372485	1.89463228	1.951510802	33.18931779	1.947727713	0.722281681	0.446124873	0
Orbaceae	0	0	0	1.708307584	0.907334451	0.228188839	0.897498609	3.850508356	0.994338157	0	0.11551503	0.148261889
Oscillatoriaceae	11.37361133	5.535128521	7.755152114	7.837193366	5.938048593	8.426013267	4.596887499	0	8.550329895	3.063533669	2.110519946	1.537437805
Oscillochloridaceae	0	0	0	0.281250841	0.160527323	0.368314045	0.093478642	0	0.191446632	0.040677111	0.159003042	0.13686192
Oscillospiraceae	0.20867401	0.598608675	0.625671595	9.527075964	11.29457069	10.2752002	11.77324557	0.931168687	10.39056464	8.074244282	7.182526671	7.180628236
Oxalobacteraceae	55.02214078	41.19765638	34.10447639	466.5649018	459.7322894	455.6866144	469.45034	116.48568	410.8455796	221.4763173	237.7966931	216.8565202
Paenibacillaceae	146.5700282	138.8878287	106.7225329	143.0665684	150.2921041	147.278067	153.7705562	20.98972118	150.8381106	84.70017226	86.76621002	81.64088379
Paludibacteraceae	1.34019084	1.537805045	0	0.140671391	0.31387416	0.064255341	0	0	0	0	0.195873312	0
Parachlamydiaceae	4.082401221	2.204801385	2.655609996	1.233676639	0.516116214	0.456032224	0.664737007	0	0.442049947	0.650833771	0.929620959	0.183562339
Parvularculaceae	0.755306501	0	1.049653858	11.41530584	11.15465696	11.87464789	8.707420774	0	10.54172865	3.051209272	2.989360921	2.702941546
Pasteurellaceae	1.656245068	3.615919972	1.581030221	11.40453111	13.76293609	10.36534394	8.547263413	137.2425868	10.35017653	4.792553544	3.03236499	2.599642373
Patulibacteraceae	0	0	0	1.915321144	2.075113015	2.815286279	3.051385608	0	3.52910352	1.270784158	1.700289732	1.251798957
Pectobacteriaceae	457.8259116	447.2961953	427.6402834	41.90248823	39.87254982	45.48651751	30.48189264	33.61335033	36.30523929	15.31970885	15.7283041	16.90022653
Pelagibacteraceae	2.938750361	3.994836426	1.010662859	3.057197525	2.434328385	3.35101911	2.983748047	4.818873913	2.942994125	1.714550615	2.868190376	0.742841797
Peptococcaceae	0.4145657	0	0	4.352988882	4.961495782	4.521919198	3.277104613	0	1.387767675	2.818725639	1.764546462	1.584696079
Peptoniphilaceae	0.264616404	0.141239418	0	0.768469936	1.224454644	1.232608633	0.634091983	0	1.00463689	0.064928785	0.511822598	0.581406596
Peptostreptococcaceae	1523.899706	1475.140706	1537.217355	357.7982322	350.3409652	332.1274881	279.2572178	1.333977614	308.0611699	199.353067	282.8856549	276.4503896
Persicobacteraceae	0	0	0	0.366892598	0.147461776	0.121079792	0.071221822	0	0.410609313	0	0.321857077	0.078669574
Phycisphaeraceae	7.790740778	6.614022021	4.977969927	5.598639386	4.467818476	3.590041538	2.331849368	0	3.502127667	2.212543121	3.013468945	1.7382956
Phyllobacteriaceae	29.6445	30.27766735	19.77315656	1114.894408	1114.951248	1136.333531	1088.105641	832.8289576	1103.287063	788.5539667	817.7874211	778.8539293
Piscirickettsiaceae	478.2903174	461.1359529	461.6337399	24.4709959	24.21791743	17.94389338	6.674582987	45.26217353	15.65961708	3.587073998	3.047183054	2.046899858
Planctomycetaceae	25.95681433	14.40335938	23.66756922	13.63972138	12.0557839	10.99830941	6.345491703	29.00570837	9.410262591	5.193562166	4.36709059	4.076767472
Planococcaceae	6.55205179	5.001951702	7.812554835	2.287264971	3.86781171	4.307494373	1.507352203	0	2.603265162	0.82397633	0.728450143	1.244886923
Polyangiaceae	30.01003204	26.96591675	25.70071724	43.97567469	47.32107075	46.28331588	48.35100144	0.361412504	49.75205143	32.34604518	25.19975831	25.36317732
Porphyromonadaceae	42.92575185	36.55303145	27.64215781	1.353547704	0.552101737	1.823045201	0.287059639	0	1.03752558	0.100867227	0	0
Prevotellaceae	0.586649575	4.221434458	4.762462523	4.056881143	2.425765959	2.580838518	1.989463577	9.085269077	3.07637804	2.069663718	1.689405803	2.305867345
Prochloraceae	9.289217141	8.391785598	10.77601588	9.381963625	7.34602927	8.512436883	1.975720358	0	4.619492226	2.132186205	2.000166623	2.706291926
Prochlorotrichaceae	8.571629304	8.594398341	4.855469098	2.582500648	1.267951938	2.673926955	1.72660581	6.122048276	2.663112001	0.985142545	0.643862291	0.44374202
Prolixibacteraceae	1.146713587	0.638692898	3.202467515	3.211884669	2.968852487	3.246685349	2.46465692	0.384220089	2.559489317	1.288724414	0.959033606	1.023705121
Promicromonosporaceae	1.337308709	0	0.47807727	6.168946999	7.254109908	5.629816568	4.368307813	0	6.214617676	0.793955753	1.414723181	1.979635462
Propionibacteriaceae	1.640808124	3.23868918	1.49241708	12.3031512	13.82934302	15.22659049	14.7970592	24.873311	15.89571611	7.923627792	8.268987658	7.77535296
Pseudanabaenaceae	0.690942833	5.732427958	0.19064431	4.298110539	4.855945233	4.935260773	4.109523839	0	4.198289547	3.144840812	1.126952854	1.921343151
Pseudoalteromonadaceae	5.07655313	5.816249873	3.384834773	104.3143864	92.79907715	108.860806	39.23166034	8.341381009	57.6966585	32.22705765	29.24546994	23.77684453
Pseudobacteriovoracaceae	6.098416562	3.24973921	0.905097744	0	0.243560461	0	0	0	0	0	0	0
Pseudomonadaceae	2940.415593	2813.608049	2776.502385	13223.77496	13274.79267	13648.88982	9173.135252	45795.23103	11262.10746	4822.147695	4598.891169	4750.607417
Pseudonocardiaceae	85.37049665	92.57365781	78.42003099	59.68886257	59.28976447	60.02046969	61.69685579	18.42683548	53.40773728	31.40049649	31.6657556	29.72085122
Psychromonadaceae	0	0	0	0.118595812	0.297964	0.366984113	0.215868203	0	0.319005117	0.187869542	0.247702333	0
Puniceicoccaceae	0.24102657	2.112983468	0.481783295	1.642641163	2.406395612	2.565863612	0.734492337	0	1.148282481	0.981737266	0.569073671	0.479365873
Pyrinomonadaceae	8.538474686	8.350850137	8.387278366	0.273899852	0.688154952	0.141259758	0	0	0.096197398	0	0.286037218	0
Rhizobiaceae	2565.204926	2475.047211	2480.937559	22863.03788	23526.00348	25799.27879	22018.22829	4065.915941	23524.07046	10311.24943	11278.30095	9762.440703
Rhodanobacteraceae	342.8454361	332.243435	397.7259264	2347.64749	2488.82022	2428.133305	2030.041208	335.352846	2169.044746	512.7812549	678.0224583	543.5172169
Rhodobacteraceae	1264.586595	1198.640198	1155.627361	1863.156213	1877.00692	1841.299758	1487.911553	555.2499505	1709.059899	2187.496407	2093.960841	2075.020365
Rhodobiaceae	0	0.149777821	0	6.29361476	9.683468891	9.393274028	7.088187388	8.335109627	10.3852018	4.901971994	3.662732772	5.89884619
Rhodocyclaceae	0	1.107194597	0.403571721	14.60540755	11.92517275	11.80542575	21.25252039	14.78114296	14.53990082	8.475271865	8.260122173	7.305219655
Rhodospirillaceae	74.20295002	60.82132577	74.90847555	860.1023741	952.9593785	848.0409128	743.7842149	8032.102512	821.8576241	978.8710038	743.760606	847.3863333
Rhodothermaceae	6.28982969	2.978756616	2.515022339	4.757915479	4.31331798	6.783336997	2.948012416	0	4.253490584	1.602725909	1.496948364	2.282130923
Rickettsiaceae	2.387225597	1.851061629	0	2.438796769	3.360518171	2.162953782	2.4118079	0	1.456328291	0.988423893	1.615967033	1.11112005
Rikenellaceae	0.971507717	0.317977514	0.865829964	27.6746122	33.04151317	35.20590715	39.96131738	7.101069083	34.91104098	21.03240994	20.84004016	20.88195558
Rivulariaceae	12.13383023	12.22972274	11.58367578	5.527044499	4.435951519	5.626732557	5.130962308	0	5.461467311	1.262900699	1.787410919	1.710384122
Roseiarcaceae	0	0	0	2.289537456	1.331800024	1.475661935	1.606559334	0	1.23188966	1.000061649	1.148001577	0.696803062
Ruaniaceae	0	0	0	0.422021654	0.55890767	0.423295829	0.503342909	0	0.315098438	0	0	0.522685982
Rubricoccaceae	0	0	0	0.434105426	0	0	0	2.826762087	0	0	0	0
Rubritaleaceae	0	0	0	0	0.182158664	0.747845776	0.527879388	0	0.624070514	0	0.302862937	0
Rubrobacteraceae	8.616327625	3.470914475	3.653905301	0.229936941	0.090698247	0.126232124	0.728320547	1.439078881	0.239126746	0.237695812	0	0.201120476
Ruminococcaceae	10.01596612	16.66443067	12.53138455	11.56791078	13.85284642	10.56978133	9.478509861	39.68770739	11.41412008	3.916019054	6.617002478	6.230526475
Saccharospirillaceae	33.21150023	29.0011924	37.0958214	14.44953707	12.84310148	14.81421521	18.90078531	4.559192059	12.37992529	12.14110445	12.72156695	12.32198935
Salinarimonadaceae	0.550308451	2.275086902	3.607076654	115.1054766	113.3716377	111.1823693	91.22299312	2.07197221	122.6140843	160.2391611	120.6381388	127.4239678
Salinisphaeraceae	0	0	0.339617733	3.316447568	1.600509871	2.166877624	1.877390067	3.597697201	2.188866089	0.76891933	0.745230524	0.348780018
Salinivirgaceae	0	0	0	0.162279223	0.13590521	0.195283866	0.065640175	0	0.145502334	0	0.084735163	0
Sandaracinaceae	8.400339888	3.669804966	5.514557014	1.198834002	1.098811131	0.97995284	0.690188261	0	1.026939976	0.84846226	0.94796559	0.404492393
Sanguibacteraceae	0	0	0.256818368	7.859249085	9.190432774	7.728783761	9.064595552	0	8.770099333	20.44478649	12.80784833	8.745000841
Saprospiraceae	0	0	0	0	0	0	0	0	0	0	0	0
Schleiferiaceae	0	0	0	0.181638849	0.114088847	0.468387618	0.551031993	0	0.390865217	0	0.189687839	0.243461628
Scytonemataceae	3.377902291	6.576726083	8.38000599	2.739692829	2.672145554	2.861714595	2.441231334	22.38885669	2.938489152	0.841641154	0.717765773	1.253297792
Segniliparaceae	0	0	0	0	0.138954365	0.342283259	0.268451484	2.029470216	0	0	0	0
Selenomonadaceae	0	0.401768886	0	1.838809425	1.816199487	2.461045816	2.00650432	55.41202961	2.303431158	1.034798836	0.849298434	0.545853038
Shewanellaceae	13.91288832	9.208849882	15.95865046	16.02782887	14.40587378	15.0365399	4.520036597	9.679675272	10.6672478	4.27901222	4.218747145	2.489621657
Silvanigrellaceae	0	0	0	0.074377977	0.373739328	0.383593308	0.902552402	0	0.720236552	0	0	0.498466696
Simkaniaceae	0.197726089	0	0	0.315106085	0.645104561	0.522317667	0.314870478	0	0.471452906	0.562864438	0.199751712	0
Sinobacteraceae	2.220125777	5.736899393	0.94166735	16.46651808	15.31646278	15.52368036	15.41976128	1.268418885	12.69905259	37.58517875	34.5364965	25.5186154
Sneathiellaceae	0	0	0	0.536446342	0.877287451	0.628112955	0.284453142	0	0.60062745	0.283264439	0.186739324	0.456695938
Solibacteraceae	3.009049261	4.464745789	3.139828539	22.91823709	26.65847664	28.39499254	28.21107515	2.283153993	24.64197	16.97492292	18.68437385	14.86325896
Solirubrobacteraceae	2.013561409	1.966131681	0.470833675	2.17221615	2.003423333	1.243234436	2.120456175	1.609540231	1.816651202	0.065867514	1.897882281	1.485976113
Sphaerobacteraceae	69.01040494	69.35812797	57.75543983	2.593679504	0.945766761	1.858372353	0	0	2.379939031	0	0	0
Sphingobacteriaceae	10.66731969	13.31679072	7.038268422	11.62593907	10.86634793	12.05387221	5.818339071	43.08659907	10.62034359	4.385690882	4.512865651	4.30584279
Sphingomonadaceae	2339.197428	2162.003094	1956.700588	48737.91837	49473.15242	48600.03333	47284.12537	28098.68302	44522.12175	24167.97483	24783.58328	22730.66892
Spirochaetaceae	12.09691935	16.37353778	12.73086984	9.796311245	9.446285754	9.588684258	3.840279649	0	8.596699491	2.444197539	4.241561865	2.694466101
Spiroplasmataceae	464.8800383	466.6022444	494.9201595	30.6328811	26.30239024	26.14707169	6.228630827	0	15.12454341	4.212822194	2.67990594	2.297612168
Spirulinaceae	2.03079575	4.484359575	2.441254904	0	0	0	0	0	0	0	0	0
Spongiibacteraceae	0.182360279	0	0	1.306356049	0.317718673	1.023104421	0.61369345	0	0.911966694	0.320645377	0.397055879	0.271306213
Sporichthyaceae	0	0	0	0.391486762	0.207434268	0.381806876	0.100187635	0	0.575933974	0	0.086221745	0.192740456
Sporolactobacillaceae	0	0	0	0.927725305	2.289714818	1.238368274	0.225152857	23.27921719	0.59890638	0.293924929	0.740874389	0.702204317
Sporomusaceae	1.51670378	1.450287685	1.515854758	1.645778954	0.864630483	0.809125877	1.161259707	0	0.523192776	0.632647728	0.589513232	0.415905771
Staphylococcaceae	545.9601729	564.7496943	581.5969159	700.8762282	679.6482506	740.1829697	515.6850158	102.6631444	633.0153497	407.5342725	372.6887247	333.5694637
Sterolibacteriaceae	0	0.359150339	0.330638994	10.57794662	15.42444909	12.748379	14.72306457	7.16168011	13.93607536	7.000231964	6.65003249	6.668957407
Streptococcaceae	287.6417471	285.996029	285.616096	233.309886	229.3184847	238.9127413	174.6654198	101.1816987	207.5759667	142.9777449	133.0171466	110.7983904
Streptomycetaceae	496.3688711	424.1382213	429.6145695	456.3498034	462.6693418	487.0606835	419.7659873	92.57416008	425.3740044	217.9493197	225.2373733	212.8708055
Streptosporangiaceae	4.52144413	11.44029662	6.33212821	4.633805401	5.944313509	5.139911579	1.790987392	8.011766273	3.506597865	2.332863591	1.906590757	0.984033089
Succinivibrionaceae	2.144305344	0	0.535776251	0.885966708	0.486087109	0.850843841	0.543666659	0	0.1314414	0.17206843	0.340303311	0.33211898
Sutterellaceae	0.896797375	0.271515046	0	49.69807515	49.63727991	54.1712796	42.9429994	5.366056843	42.17211856	113.6107356	115.7731518	116.234374
Symphyonemataceae	4.849161243	6.329785877	2.768096259	0.225460988	0.095492868	0.180700049	0	0	0.07703775	0	0	0
Synechococcaceae	78.38717294	74.87418915	68.7882056	43.90028027	37.18447158	48.07247176	17.55004799	2.6763686	32.02803088	14.3311194	14.38058353	13.967719
Synergistaceae	0	1.057098579	0.134815716	2.014735454	1.469135974	1.55236901	0.65000741	0	1.228320248	0.838752921	1.100262832	1.217125018
Syntrophaceae	0	0	0	0.886103035	1.505213774	1.524548137	1.188441974	0	1.304644709	0.812662709	0.389629076	0
Syntrophobacteraceae	0.336134351	0	0	1.824035951	2.418713974	2.699345588	1.941638004	0	0.855351635	0.696341398	0.487036345	0.500083344
Syntrophomonadaceae	0.937460125	1.792817942	0.624623569	0.111687318	0.035075859	0.175842451	0.033882226	0	0.453803727	0.225824744	0.116636536	0.037425331
Syntrophorhabdaceae	0	0	0	0	0.066698095	0	0	0	0.057126455	0	0.166341644	0
Tannerellaceae	2.647315746	3.40602817	5.418358585	7.695648989	7.95656115	9.611867907	8.099414273	0.418779568	6.126155442	3.793701751	4.239259399	4.360663864
Thermaceae	0	0	1.855225227	7.515269566	7.207665294	10.69669581	6.692624273	2.339128444	5.555746691	3.461399888	3.015127701	3.766916239
Thermoactinomycetaceae	0	1.055534824	1.570548811	4.824727031	6.306521235	4.471989116	7.081594321	8.434693323	6.030265845	2.333694794	4.021056033	2.178213819
Thermoanaerobacteraceae	1.596826673	0.217808773	2.07061576	17.21935437	17.8536067	15.7528998	19.4141609	0.375115348	16.10887571	15.13000802	13.12034989	12.75666796
Thermoanaerobacterales_Family_III._Incertae_Sedis	43.26106684	37.64242488	48.41589355	2.209054469	2.278144608	2.647259057	0.431830328	0	1.516389286	0.401985565	0.26500507	0.510195324
Thermodesulfobacteriaceae	4.198298607	0.540561774	1.205722524	2.574834287	1.701653957	1.126267521	0.632706591	0	1.456694794	0.903498959	0.733078001	0.412134266
Thermodesulfobiaceae	0	0	0	0.698828595	0.742821467	0.499029798	0.130462403	0	0.404868176	0.255467462	0.392967019	0.360262534
Thermoflexaceae	1.205132848	0	1.204458238	1.444671821	1.099240996	1.015530675	0.646121584	0	1.147950387	0.78140976	0.870801475	0.254503583
Thermogemmatisporaceae	6.611688563	1.766191933	2.380973262	2.532056368	1.853147682	2.7840685	1.413465328	0	1.613502326	1.515041916	1.110781403	0.657447157
Thermomonosporaceae	5.413081524	5.726452068	8.00930704	26.79334468	32.14129082	26.02392625	20.68055713	4.083100792	24.19284091	9.749697767	8.408042922	6.863947713
Thermonemataceae	3.493531178	1.416682625	1.004472971	0.871372317	1.560160467	1.210680085	0.634429068	0	1.266758953	0.306299726	0.287072011	0.590603105
Thermosporotrichaceae	0	0	0.384830001	0.480808719	0.536888694	0.220417702	0.38896376	0	0.229920716	0.08462854	0.278952705	0
Thermotogaceae	0	0	0	0.941999072	1.539284029	2.154512751	1.110729572	0	1.124964207	1.112923614	0.136724922	1.194640886
Thiobacillaceae	0.134308542	0	1.243000902	1.149325049	1.13812565	3.517729705	2.814978734	0.904563868	3.674489996	1.318169224	0.74323686	0.518430792
Thiofilaceae	0	0	0	0.40761474	0.398262906	0.233579127	0.329751429	0	0.438569239	0	0.283784957	0.121411311
Thiolinaceae	0	0	0	0.754347134	1.302981918	1.264390618	0.572109719	0	0.608724518	0	0.295415488	0.126387184
Thiotrichaceae	2.652740427	1.792817942	0.312311784	5.507304642	4.412698642	5.171274338	2.490948863	2.994447988	3.497260651	2.633859248	2.64492267	1.869509612
Thorselliaceae	0	0	0	1.568699153	0.606346322	0.248933279	0.585712328	0	0.519331407	0.573461924	0.126016397	0.161740243
Tolypothrichaceae	47.69667157	49.69846451	43.26526034	1264.076711	1386.963865	1290.102273	1496.765184	440.947418	1234.512173	933.9703396	900.3800094	874.960505
Trueperaceae	1.413292159	0.450468145	0.170274096	0.472758649	0.461162371	0.438872781	0.114735429	0	0.305196128	0.149780923	0.19748323	0.316833626
Tsukamurellaceae	0	0	0	0	0	0.15751088	0.185302794	1.400873247	0.821508752	0	0	0.20468013
Veillonellaceae	0	0	0.222760018	1.560432227	1.846560736	1.40654574	3.463495423	2.129578612	1.662519868	0.759635579	1.142492659	1.007373465
Verrucomicrobia_subdivision_3	0.467555301	0.894162332	1.401880716	0	0	0.659212203	0	0	0.515724938	0	0.270982628	0
Verrucomicrobia_subdivision_6	0	0.69955053	0	0.203008126	0.765066388	0	0.123171857	0	0.655274039	0	0	0.136052086
Verrucomicrobiaceae	4.291318261	4.567930425	7.406223407	1.106363137	0.502968495	1.07318683	0.753361189	0	0.623855069	0.363837798	0.675676524	0.315393473
Vibrionaceae	594.7201477	573.5597025	578.7976399	292.2534066	269.6899718	278.1466012	169.1234135	100.3753441	214.8470533	400.4264472	248.8068767	316.1165013
Vicinamibacteraceae	3.413019339	1.189235902	4.947000716	0	0	0	0	0	0	0	0	0
Victivallaceae	0	0	0	0.173598498	0.087230909	0.071624666	0	2.229558829	0.037356334	0.165000111	0	0
Vulgatibacteraceae	0.536076336	1.281504205	0.803664376	0	0.093434832	0	0	0	0.080026284	0	0	0
Waddliaceae	0	0	0.113619827	0.252368419	0.141878106	0.130155243	0.038280102	0	0.101825034	0.149917834	0.065887915	0.042283098
Wenzhouxiangellaceae	1.650925353	1.31552644	1.925001397	0	0.668450075	0.156817	0.184894638	0	0.327155908	0.120418583	0.238856856	0
Williamsiaceae	0	0.241714614	0.240891648	2.541031101	3.059009585	1.806074266	2.36471253	0.259506028	1.99420258	0.529876912	0.554725287	0.41287998
Woeseiaceae	0	0	0	0.666580962	0.330479713	0.632826339	0.175124384	0	0.432056658	0.230154949	0.429641769	0.310541849
Xanthobacteraceae	3.925707537	4.533853675	3.159976696	27.90388974	35.61044595	32.8878862	57.86068811	11.71491802	44.66547802	335.6185316	198.1177011	320.9181279
Xanthomonadaceae	4317.099399	3945.146186	3700.701722	103065.0603	110779.353	105216.5978	133553.7595	75716.89622	104613.5123	82190.36937	70658.63429	70080.80611
Xenococcaceae	2.665065213	0.849454216	0.443928894	0	0	0	0	0	0	0	0	0.33041221
Yersiniaceae	60.64569552	43.03517597	41.68154255	396.7700842	418.9076926	410.1045782	398.7964033	244.784926	368.138123	438.3088793	327.710756	406.1538526
Zoogloeaceae	4.755205775	3.706360278	3.998734184	163.9232959	172.0725698	168.0591522	101.3411406	20.49233705	133.2751803	92.08360217	81.8806873	80.29079837
norank_d__Bacteria	1523.063206	1548.65345	1622.67182	755.9757448	723.0763521	796.1633323	611.4564445	145.04988	649.9413434	426.3251748	412.5132891	382.7464063
norank_o__Acidimicrobiales	1.684367007	4.884484954	1.085590307	0	0.283976607	0.575590268	0.237865705	0	0.291982177	0	0	0
norank_o__Acidithiobacillales	0	0	0	0.695918362	0.558541301	0.515118107	0.371413736	1.256338705	0.478386739	0.398082792	0.349909607	0.673655962
norank_o__Acidobacteriales	0.74921512	3.223832264	0.748795724	0.103949944	0	0.321663786	0	0	0	0	0	0
norank_o__Actinomycetales	0.309377388	2.662468437	0.618408409	0.085849207	0.090320338	0.074161373	0.087246732	0	0.092368646	0	0	0.048185114
norank_o__Alteromonadales	25.30213191	24.17089401	20.12095552	0.928284623	0.160173998	1.532362125	0.377480883	0	1.958913703	0.290798068	0.280475966	0.439693761
norank_o__Anaerolineales	1.371724742	0.437219082	0.913971251	0.997438768	1.890554226	0.308648488	0.484143716	0	0.731501728	0.158005887	0	0.267385603
norank_o__Aquificales	0	0	0	0.214801129	0	0.221560948	0.34753885	0	0	0	0.074773215	0.383881406
norank_o__Bacillales	145.3504089	145.5373501	146.8858424	55.07542636	57.37832192	56.05598274	57.21296401	14.76782991	53.52552655	23.25665693	28.03887027	22.60614497
norank_o__Bacteroidales	3.407389314	4.723767243	1.277055721	12.08309491	11.26475715	9.741217906	9.324099252	2.424944099	8.790524962	6.666036527	5.730372793	5.576781469
norank_o__Bdellovibrionales	0	1.382832444	0	1.535438928	1.159790162	1.868360679	1.294175684	0	0.731588272	0.746140373	0.545030328	0.458670909
norank_o__Burkholderiales	25.70370641	23.57355567	18.99007098	1139.384067	1396.386292	1132.907926	1027.446016	22078.46257	1150.79843	638.1034704	562.7624512	525.2699965
norank_o__Caulobacterales	2.844998376	0.664377599	1.320320621	4.969665852	3.955894331	3.092522924	5.325855726	4.477766302	3.78564278	0.813466649	1.781234907	1.373305665
norank_o__Cellvibrionales	0	0	0	2.258482366	2.399487778	1.375522753	1.251796347	0	2.291974963	0.195949953	1.343480724	0.65323621
norank_o__Chlamydiales	0.35332304	1.689255542	2.471876794	1.837599612	0.774764115	1.655878033	1.138202283	0	0.842249593	0.190487933	0.358811996	0.27016912
norank_o__Chromatiales	2.551173537	0.609864565	0.63743636	1.800241698	0.885263865	1.796662125	0.878956901	0	0.819370475	0.767305702	1.009668484	0.585168031
norank_o__Clostridiales	31.02150092	36.3946808	20.67109529	3.08424344	2.616803868	3.025880641	1.047256505	0	1.931882414	0.945853182	0.653037827	0.566848196
norank_o__Cytophagales	2.186455311	0	0.481783295	1.232549334	0.942212159	2.256871012	0.498552755	0	1.105124868	0.650833771	0.214527914	0.275343508
norank_o__Desulfobacterales	0	0	0	0.920682785	1.041986095	0.941444238	0.090645956	0	0.768393041	0.118333413	0.92984235	0
norank_o__Desulfuromonadales	0.847975295	1.081123547	1.83987313	4.178504598	3.991814095	3.371231564	1.824560082	2.375450715	3.983966317	1.893599874	1.462387556	1.437910881
norank_o__Enterobacterales	115.5189902	107.4858051	107.2795954	96.85880329	96.14343138	90.85935477	70.0745318	19.06781165	92.73849434	42.09425514	34.34353781	23.8534948
norank_o__Entomoplasmatales	24.77083565	23.37488827	24.27141308	0.616691802	1.261819254	1.70831179	0	0	1.102793061	0	0	0
norank_o__Flavobacteriales	0	0.145739694	0	1.386691648	3.824511879	2.683617383	0.469053479	1.35951628	1.41303761	0.644366383	1.18535838	0.362365213
norank_o__Holosporales	0	0	0	0.619964935	0.389405048	0.319737655	0.501538101	0	0.111174238	0	0.215812512	0
norank_o__Hydrogenophilales	0.24102657	0	2.624737953	4.551458825	3.361584938	5.367542996	2.36917179	0.977152326	6.461067834	1.74694507	2.665867387	1.969122727
norank_o__Ignavibacteriales	2.726134953	3.957528246	4.500439023	1.568662826	0.319936255	1.728730521	0.82470431	0	2.256281265	1.537390729	1.349710332	0.555123909
norank_o__Kordiimonadales	2.612809033	1.499036851	4.178154292	0.684300603	0.842652314	0.858734931	0.16107089	2.240075616	0.892551914	0.329337571	0.566717856	0.388456632
norank_o__Lactobacillales	0.250745383	0.151688253	0.600483528	9.986984309	9.272630448	13.33652608	67.82077149	0	33.35182588	44.57159084	43.14152059	28.4494532
norank_o__Legionellales	0.731586529	6.375841718	1.980271045	1.611771551	1.540150013	0.781382559	0.919253141	0	1.107778359	1.170560911	0.858078609	0.793600059
norank_o__Marinilabiliales	2.236865287	0.427782699	0	0.776969943	1.562396161	0.953930561	0.277923058	0	0.241746065	0	0.290650722	0.932615108
norank_o__Methylococcales	0.49747884	0.475694361	1.190281153	1.293767969	0.786228635	1.385071856	0.571422123	0	0.760990869	0.273185331	0.252287932	0.312091344
norank_o__Micrococcales	2.155245677	1.458037947	0.272587917	1.796062758	4.271325422	1.180754923	1.973825999	1.11435161	2.164216857	0.40574383	0.916337114	0.118004361
norank_o__Mycoplasmatales	0	0	0	0.951282975	0.443836571	0.691848792	0.336284877	0	0.436723261	0.434990757	0.403744847	0.487145019
norank_o__Myxococcales	34.2115664	27.15556074	28.97826605	6.468181953	6.492253996	6.668987675	4.600487577	0	6.07737535	2.567083099	3.479289945	1.466230643
norank_o__Nitrosomonadales	0.391099717	0.373973554	0.751815062	8.591945815	11.2498325	11.18087224	4.73218581	15.67538809	7.595380524	3.149402176	2.501411005	1.312080844
norank_o__Nostocales	0.063518749	0	0	1.603950819	1.793490665	1.327177989	1.069418576	0	1.213718343	0.725955545	0.478579125	0.401624647
norank_o__Oceanospirillales	5.105488914	4.881920779	6.735472868	2.861781213	2.811943513	3.273329557	1.031488459	0	2.164520431	0.538621052	0.769341484	0.835525128
norank_o__Opitutales	1.652902986	3.282324301	1.894818448	0	0	0.160348914	0	0	0	0	0	0
norank_o__Oscillatoriales	3.494763031	2.296545135	2.961609763	0	0.185272487	0	0	0	0.258724886	0	0	0
norank_o__Pelagibacterales	0	0	0	0	0.878792473	0.721570114	0.282962375	0	0.250893213	0.369392141	0.243518172	0
norank_o__Petrotogales	0	0	0	0.920832717	1.270197915	0.852066836	0.673691271	0	0.79164816	0.145399034	0.386520333	0.250041672
norank_o__Planctomycetales	2.560552852	2.541700261	3.195951086	0.139158796	0.651951734	1.479399772	0	0	0.149726595	0	0	0
norank_o__Pseudomonadales	0	0	0	1.546771156	2.321621612	1.858475671	1.174021292	1560.156633	2.86518703	0.787187992	0.121770186	0.903356682
norank_o__Pseudonocardiales	0.75917073	1.949957509	1.279368744	0.239662371	0.150533896	0.61801144	0.240680641	0	0.386793704	0	0	0.160617046
norank_o__Rhizobiales	790.3604952	641.1369123	655.3743044	20490.41345	21284.70039	23412.67799	19234.16482	22901.34248	20957.29883	8444.184492	9242.68321	7774.011945
norank_o__Rhodobacterales	0.567538289	1.214407605	0.698315113	7.455790846	9.650267449	7.319291596	4.136229794	4.073487197	4.868489582	1.341601859	2.545449136	1.351607315
norank_o__Rhodocyclales	2.32777532	0.635955028	0	0.711594733	1.005916221	0.916611638	0.482874996	0	0.960844191	0.343836709	0.037778501	0.322020637
norank_o__Rhodospirillales	6.320988006	2.314586136	2.488755726	13.81334894	14.61757286	15.13722787	15.48044856	3.651812693	10.18052682	24.08475223	22.89431813	25.47290129
norank_o__Rickettsiales	17.70169721	16.75102679	14.67417457	3.381462538	1.38323698	3.001197209	0.737744522	0	1.800863798	0.764775576	1.665956077	0.601045765
norank_o__Silvanigrellales	0	0	0	0.625596469	0.176954131	0.831177162	0.085466187	0	0.075779991	0.334714511	0.220657283	0.188806977
norank_o__Solirubrobacterales	0	0	0	0	0.218958394	0	0	0	0.375072683	0	0.364047369	0
norank_o__Sphingobacteriales	0	0	0	1.142760972	1.541159082	0.927398213	0	0	1.090336031	0.724106448	0.684490525	1.051951791
norank_o__Sphingomonadales	3.6447859	2.744157181	3.493096626	61.77315731	60.36684872	65.77234231	50.15306863	6.826079996	55.35199687	20.28341602	18.86471149	21.1805063
norank_o__Synergistales	0	0	0	0.383459793	0.28902508	0.55373825	0.093063181	0	0.412579951	0.728933824	0.400452106	0.616769458
norank_o__Thiotrichales	0.960383861	0.688746661	1.19980782	3.45245937	2.900392455	3.365285347	1.588708769	0	3.237770375	1.597178186	2.074261892	0.504272288
norank_o__Verrucomicrobiales	0.685862371	0	0	1.171616044	0.788466025	0.712840229	0.376722436	0.290990215	1.472623839	0.682092527	0.449662858	0.492103291
norank_o__Victivallales	0.433343937	1.864655595	0.43310136	0	0.075529202	0	0	0	0	0	0	0
norank_o__Xanthomonadales	2.958397206	7.317366778	2.651791504	90.92840308	95.55547227	87.76497611	98.30916115	2.933777745	81.31213393	58.4058728	47.47486869	52.72877929
norank_p__Acidobacteria	439.6400269	421.2787291	435.6124015	120.2000948	119.0860333	121.8000284	98.60369896	51.32196286	102.7615627	57.41211464	53.06431454	53.16968279
norank_p__Actinobacteria	13.37788488	12.24297945	14.37623632	51.54064881	44.60401236	54.99869612	44.04100315	7.702843004	49.26714688	18.17574284	26.57959606	18.25026294
norank_p__Aquificae	1.081475739	0	0	0	0	0	0	0	0	0	0	0
norank_p__Armatimonadetes	0.552754266	1.585647869	0	1.782330603	1.451266315	1.461355154	0.690394261	0	1.162429488	0.859202864	1.183476862	1.119144908
norank_p__Bacteroidetes	15.74577506	14.51444717	16.7584203	23.19745436	23.91838413	19.18986696	11.69716328	23.55971212	17.9320673	8.344115498	6.321286551	5.901130948
norank_p__Caldiserica	0	0	0	0.313107291	0.087406778	0.179422676	0.126648482	0	0.187158244	0.165332773	0.145325361	0
norank_p__Calditrichaeota	0	0	0.147274988	0.818024752	1.214485744	0.620154443	0.09025524	0	1.156255666	0.541826253	0.283454516	0.197787872
norank_p__Candidatus_Aerophobetes	0	0	0	1.121489489	0.473811607	0.486304084	0.794867333	0	0.59793153	0.730967821	0.098471829	0
norank_p__Candidatus_Aminicenantes	0.837395168	3.255224396	1.445349886	1.439514682	1.695627124	1.436953612	1.000125486	0	1.046887903	1.707771225	0.406416248	0.352253694
norank_p__Candidatus_Atribacteria	3.712528655	1.774978958	0	0.321036106	0	0.496708729	0.194783402	0	0.277105937	0	0.083815557	0
norank_p__Candidatus_Aureabacteria	0	0	0	0.673392807	0.105740883	0.607761494	0.102142516	0	0.090566331	0.133341553	0.175808241	0
norank_p__Candidatus_Azambacteria	0	0	0	0	0.209438464	0.171968401	0	0	0.269073881	0.132053229	0.174109611	0.223467195
norank_p__Candidatus_Berkelbacteria	0	0	0	0.56576035	0.71071741	0.46685192	0.480572164	0	0.426107162	0.179246022	0.413581683	0.303329242
norank_p__Candidatus_Bipolaricaulota	0.399902604	1.831361215	4.506691517	3.437008901	2.321246875	2.490640796	2.969750279	0	2.137407166	1.041707685	1.72805324	0.772115823
norank_p__Candidatus_Blackburnbacteria	0	0	0	0.718987112	1.103915236	0.494409152	0.096940814	0	0.343816626	0.506204044	0	0.107078031
norank_p__Candidatus_Buchananbacteria	0	0	0	1.529640316	2.022853033	1.379159467	0.918591623	0	1.917296842	1.07143816	1.154602458	1.129718782
norank_p__Candidatus_Campbellbacteria	0	0	0	0.189921124	0.204498877	0.139927118	0.347105598	0	0.087575933	0.128938766	0.170003252	0
norank_p__Candidatus_Cloacimonetes	0.560223919	1.071383695	1.119820632	4.35109746	2.124300824	3.37334887	1.386211122	0	2.395298564	1.294802072	1.823618921	0.605302596
norank_p__Candidatus_Collierbacteria	0.628129848	0	0	0.655279393	1.097563595	1.952603233	0.265053364	0	0.313351861	0.576688152	0.608281679	0.097590104
norank_p__Candidatus_Colwellbacteria	0	0	0	0.035505536	0.044602636	0.219737401	0.086169612	0	0.038201847	0.168734681	0	0.142770708
norank_p__Candidatus_Dadabacteria	2.521007634	1.43281434	4.482655483	1.041841547	1.087141868	0.658768141	0.239762012	0	0.414559712	0	0.383676061	0
norank_p__Candidatus_Daviesbacteria	0	0	0	1.001751039	0.588134474	0.678355035	0.2100848	0	0.36968417	0.243338443	0.666943496	0.068631616
norank_p__Candidatus_Desantisbacteria	0	0	0	0.476676538	0.479047094	1.180026263	1.041176473	0	0.307725378	0	0.398239663	0.255567455
norank_p__Candidatus_Doudnabacteria	0	0	0	0.51926847	0.501779653	0.453208389	0.484704068	0	0.214885391	0.063275506	0.208568805	0.053539015
norank_p__Candidatus_Falkowbacteria	0	0	0	0.963506077	1.812321401	1.659179863	1.07693984	1.308253528	1.723265901	0.604894377	0.416203054	0.572763016
norank_p__Candidatus_Fermentibacteria	0	0	0	0.254471592	0.287587144	0.117010246	0	1.161942836	0.061579097	0	0	0
norank_p__Candidatus_Fraserbacteria	0	0	0	0.737222374	0.438723543	0.276664189	0.299763096	0	0.485765819	0.296903098	0.257976918	0
norank_p__Candidatus_Glassbacteria	0	0	0	0	0.333490477	0	0	0	0.285632274	0.420538745	0	0
norank_p__Candidatus_Gottesmanbacteria	0	0	0	0.332452005	0.756332915	0.936041221	0.327175246	0	1.020040033	0.56947955	0.267447963	0.788871334
norank_p__Candidatus_Gracilibacteria	1.302300628	1.556591495	1.301571625	0.949224462	0.717410219	0.563760662	0.189495165	0	0.924104415	0	0.326160086	0.209310902
norank_p__Candidatus_Harrisonbacteria	0	0	0	0.22956573	0.048064038	0.157860128	0	0	0.041166514	0.181829391	0.119869256	0
norank_p__Candidatus_Hydrogenedentes	0	0	0	1.518843448	2.576005857	2.080014618	1.645188229	0	1.428117808	1.101575561	1.504114111	0.923723112
norank_p__Candidatus_Hydrothermae	1.019423852	1.299711368	0	1.925016994	0.661326496	1.190766849	0.448933572	0	1.513210277	0.681018457	0.559051299	0.139704994
norank_p__Candidatus_Jorgensenbacteria	0	0	0	0.392174788	0.246328193	1.011291447	0	0	0.210978384	0.621250418	0	0
norank_p__Candidatus_Kaiserbacteria	1.290142219	2.220564962	0.773652014	6.395835968	6.589655754	7.74906639	6.580765462	0	5.48487891	3.033055037	4.493722946	3.928712518
norank_p__Candidatus_Komeilibacteria	0	0	0	0.232139337	0	0	0	0	0	0	0	0
norank_p__Candidatus_Kryptonia	0	0	0	0.878984945	0.96292466	0.625069846	0.466569487	0	1.205791391	0.132479895	0.89506618	0.494019097
norank_p__Candidatus_Kuenenbacteria	0	0	0	1.104364204	1.387320384	1.139118686	0.335027452	0	1.188230258	1.312080883	1.585790338	0.185030837
norank_p__Candidatus_Latescibacteria	1.560329898	2.50365453	0.327105501	1.975039873	1.832187767	2.262964438	0.627872562	0	1.752808667	0.916383907	0.804647187	0.376266726
norank_p__Candidatus_Levybacteria	0	0	0	0	1.301125619	0	0	0	0	0	0	0.259874772
norank_p__Candidatus_Lindowbacteria	0	0	0	0.784349576	0.715689962	1.734456397	0.555366066	0	0.552703935	0	0.185411449	0
norank_p__Candidatus_Lloydbacteria	0	0	0	0.165284393	0.041526592	0.136388732	0.16045376	0	0.035567237	0	0	0
norank_p__Candidatus_Magasanikbacteria	0	0	0	2.054072354	2.402183576	2.432045597	0.802487822	0	1.254696592	1.058189832	1.063240225	0.727616385
norank_p__Candidatus_Margulisbacteria	0	0	0	1.007096064	1.293407481	0.632904865	0.904418729	0	0.919424593	0.590334971	0.709565222	0.469326455
norank_p__Candidatus_Marinimicrobia	2.249686374	1.477311679	0.363450556	2.199068162	1.894596572	2.359145783	1.387095389	2.826762087	1.51940922	0.824914607	1.420918041	1.570936628
norank_p__Candidatus_Melainabacteria	3.244606923	2.974715282	3.301756542	10.41866077	12.36054175	11.60936838	12.44812944	0	11.3100955	12.32254233	10.16476783	9.997964716
norank_p__Candidatus_Microgenomates	0	0	0	0.254696541	0.079988491	0.45974578	0.077266479	0	0.411057516	0.403468906	0.332478685	0.256038982
norank_p__Candidatus_Moranbacteria	0	0	0	0	0	0	0	0	0	0	0.076682318	0
norank_p__Candidatus_Nealsonbacteria	2.431809971	0.332188799	0.694413912	0.395724063	0.487120921	0.199985724	0.058818022	0	0.05215196	0	0.101237892	0.259874772
norank_p__Candidatus_Nomurabacteria	1.984623031	2.530289153	0	1.819591693	1.674845475	1.266931469	0.726854632	0	1.584190529	0.930240006	0.420965562	0.348820243
norank_p__Candidatus_Omnitrophica	1.266738359	3.867065698	4.209154111	3.691088184	3.935225712	2.678458312	2.874875596	4.664200759	3.23094218	1.27076154	2.099240346	1.502436539
norank_p__Candidatus_Pacebacteria	0	0	0	0.161268137	0.607763019	0	0.195693605	0	0.69405973	0	0.336828874	0
norank_p__Candidatus_Parcubacteria	2.014084372	0	1.509717695	1.55487122	1.478959195	1.898944948	0.510039189	9.203411445	0.690763629	1.122787252	0.65653003	0.445670505
norank_p__Candidatus_Peregrinibacteria	2.167938039	0	0.778015872	1.94945769	1.902906123	2.501397092	1.186098684	0	1.968311397	2.246285135	1.36491075	1.237501753
norank_p__Candidatus_Poribacteria	3.246300938	5.554023499	4.661253382	0.795983321	1.238070566	1.028968546	0.435533737	0	0.993909318	0.825302901	0.91183504	0.067431063
norank_p__Candidatus_Raymondbacteria	0	0	0	0.504552359	0.253530772	0.624516823	0.367354662	0	0.651442028	0.479561726	0.421528532	0.13525646
norank_p__Candidatus_Roizmanbacteria	0	0.285874015	0.828667268	2.923022609	2.692206661	2.123378201	0.942455411	0	1.357078473	2.706528761	1.482910001	3.363584258
norank_p__Candidatus_Rokubacteria	33.09809258	28.33554555	38.58826633	18.71732716	20.3926165	18.79479415	14.14629364	3.563067281	18.59839112	10.1094656	7.458096286	7.414362648
norank_p__Candidatus_Saccharibacteria	0	0	0	0.550691875	0.540899048	0.163791989	0.329800059	0	0.470942782	0	0.575094768	0
norank_p__Candidatus_Schekmanbacteria	0	0	0	0.602024097	1.509486686	2.354861214	0.310818798	0	0.993267402	0.734251996	0.889204023	0.302683731
norank_p__Candidatus_Staskawiczbacteria	0.20321848	0	0	0.56391146	0.495876363	0.639823608	0.136857619	0	0.667408744	0.267990376	0.176670047	0.604675939
norank_p__Candidatus_Tectomicrobia	2.249356303	2.510505484	4.850685516	9.067183226	9.897294501	11.75553956	4.265496582	0.391828408	7.405872899	5.429626993	5.993485867	3.381479641
norank_p__Candidatus_Terrybacteria	0	0	0	0.243896688	0.229790258	0	0	0	0.065604586	0	0.06367613	0.163454803
norank_p__Candidatus_Uhrbacteria	0.654577421	1.998108904	0.95615454	0.907225899	0.3352095	0.473183282	0.365448111	0	0.600210312	0.42270647	0.325109312	0.165221659
norank_p__Candidatus_Wallbacteria	3.283688712	2.15867903	3.692081887	0.092601728	0.116327806	0.227806066	0.086525685	0	0.137993662	0.056477311	0.074464234	0.09557378
norank_p__Candidatus_Wildermuthbacteria	0	0	0	0.423836272	0.84702889	0.503746739	0.451148846	0	0.627233033	0.404254451	0	0
norank_p__Candidatus_Woesebacteria	0	0	0	0.261896388	0.486933809	0.257885224	0.136411829	5.989679665	0.241903554	0.178078296	0.463494209	0
norank_p__Candidatus_Wolfebacteria	0	0	0	0.713985462	0.61421724	0.509584297	0.259577054	0	0.378115515	0.388236493	0.218072288	0.09557378
norank_p__Candidatus_Yanofskybacteria	0	0	0	0.656737145	0.547395985	0.063566891	0.255319441	0	0.281304512	0.64984766	0.364047369	0.3988309
norank_p__Candidatus_Zambryskibacteria	0.254855963	1.043189388	0	1.10384764	0.944404384	0.339355676	0.113800085	0	0.506167669	0	0.073853872	0
norank_p__Chlamydiae	4.342168496	4.555723084	3.24246264	2.478522587	2.874904603	3.684189861	0.91299543	2.165179471	2.774071884	2.03000021	1.257885628	0.674904303
norank_p__Chlorobi	0.637793384	0.609864565	0.31871818	0	0	0	0	0	0.095210758	0	0	0
norank_p__Chloroflexi	61.35661584	58.12155736	43.81975916	39.26637402	36.67724738	38.65784845	23.535017	13.88609593	31.62079809	17.04576796	13.71093614	13.08625177
norank_p__Cyanobacteria	18.03008377	14.02146224	19.15829478	3.245973896	4.364869022	3.668945501	2.077931734	0	3.01636589	1.919621518	1.991167662	1.195836436
norank_p__Elusimicrobia	2.811668072	4.541414679	5.878831795	2.024003595	1.51882969	2.714105097	1.382012369	0	2.556842169	1.905684172	1.628420349	0.437428726
norank_p__Firmicutes	5.025555022	5.078766701	8.239417563	18.94044958	19.85329661	18.98838357	20.37689744	2.638311281	17.18296304	12.14172092	15.26890658	12.54104798
norank_p__Gemmatimonadetes	7.636196018	4.492482309	4.804450388	25.77782212	26.98122023	26.93309137	22.56851814	13.68185413	21.71116987	11.33400077	14.75464066	7.566517365
norank_p__Ignavibacteriae	9.897799498	6.678055903	5.730332673	3.318478504	4.756820531	3.61046008	1.465639561	0	2.549711735	1.576829767	2.30896392	1.756155905
norank_p__Lentisphaerae	5.825042663	4.883020208	4.064241532	2.815348731	2.739854551	2.701556566	2.082917907	0	2.244224891	0.872253	0.995540609	1.142468079
norank_p__Nitrospinae	0	0	0	0.181638849	0.091271078	0.187355047	0.176330238	0	0.228587712	0.057547407	0	0.048692326
norank_p__Nitrospirae	7.317414322	8.756315742	6.905455633	5.034354218	4.59066732	4.603842467	5.316592619	0.590666705	6.571534005	1.249442691	3.284948372	1.031891956
norank_p__Planctomycetes	20.70429136	27.9553368	20.40195283	21.16335465	19.56966586	21.49530315	44.70556097	12.95433333	30.79329041	649.7983879	324.8348473	468.3104735
norank_p__Proteobacteria	670.3593602	616.6805784	616.1822144	11595.02787	11999.25087	13084.80769	10980.26078	7313.848646	11984.77386	6335.013721	6258.088401	5768.410878
norank_p__Rhodothermaeota	0	0.56630281	1.775715574	0.164339911	0	0	0	0	0	0	0	0
norank_p__Spirochaetes	0.329020397	0.996566398	0.320361057	7.018800351	4.397277895	7.169300441	3.751506601	9.245172651	5.713665017	4.738025708	3.423785372	1.441193833
norank_p__Tenericutes	0	0	0	1.111190631	2.548556497	0.503319383	0.46327056	0	0.285632274	0.260333509	0.171622331	0.550687016
norank_p__Thermotogae	4.766509248	0.887489479	0.927612613	5.429869908	5.451870031	7.096291473	3.85601201	0.320442666	4.706463532	3.378858629	2.706092012	2.270093419
norank_p__Verrucomicrobia	27.37608373	24.02573542	18.76167546	16.96457267	13.40783408	19.04861068	12.64334492	24.79904671	18.23300107	9.619359956	9.101330372	5.633691511
norank_p__candidate_division_AD3	0.355342028	2.254626142	1.420572459	0.33398111	0.419552536	0.459322051	0.270183429	0	0	0.176354957	0.116260289	0.298436835
norank_p__candidate_division_NC10	2.555541985	1.900605323	1.986531122	0.078793108	0	0	0	0	0.084776702	0	0	0
norank_p__candidate_division_WOR-3	0	0	0	0.792548605	0.305096117	0.629208576	0.250663543	9.635571635	0.387802214	0.290798068	0.651147488	0.123025823
norank_p__candidate_division_WWE3	1.901597184	0.378737548	0.39586016	1.851435038	1.119787858	1.22011268	1.024926535	0	1.432715454	0.557857518	0.97974132	0.118004361
norank_p__candidate_division_Zixibacteria	2.640340768	1.443247454	3.455214852	1.895937247	1.785371375	2.398114961	1.037373082	3.965490478	2.119927302	0.45126386	0.45887667	0.733340631
