# Supplementary material for: Metagenomics of Virus Diversities in Solid-State Brewing Process of Traditional Chinese Vinegar
Source: Foods. 2022 Oct 21;11(20):3296. doi: 10.3390/foods11203296 (PMC9602057; doi:10.3390/foods11203296)
Supplement: Supplementary file 1 [file foods-11-03296-s001.zip › Supplementary file S2.xls]

family	0d-1	0d-2	0d-3	8d-1	8d-2	8d-3	12d-1	12d-2	12d-3	18d-1	18d-2	18d-3
Ackermannviridae	0	7.761332989	0	412.9696296	336.7690914	342.1449913	135.3581774	280.5049097	158.7211237	58.87181234	139.4972163	105.5090564
Alloherpesviridae	2.066396723	4.316696438	12.17541351	38.05811286	45.41956692	39.22611762	25.45711645	42.48960884	36.85237305	14.76744452	29.13386788	32.36023984
Ascoviridae	6.782737244	13.98094885	0	278.2906114	211.0272483	201.4500879	98.39255305	151.0185996	94.46079397	44.07044747	84.50268498	62.77695465
Astroviridae	0	0	0	0	1.653323476	0.475832673	0	2.065799176	0.949619716	0	0	0
Autolykiviridae	0	0	0	0	0	0.299207803	0.418990678	1.515491639	0	1.441872206	0.6913721	1.342095017
Baculoviridae	2.595847011	54.2915103	8.160605287	40.99629237	52.23578148	57.00264806	21.27298435	37.28967843	26.98480256	15.18273755	28.42596271	13.37296741
Bicaudaviridae	0	0	0.593434722	7.969990214	5.652175138	2.954790735	1.826511356	1.900451521	2.597152717	2.508510199	3.007052145	0
Bidnaviridae	0	0	0	0	0	0.650686849	2.73353557	0	0	0	0	0
Caulimoviridae	10517.12266	9669.399843	16379.31129	57.62210942	33.04852083	5.123102757	33.93176546	5.625449015	30.19002402	7.697101119	7.212912279	21.375808
Circoviridae	0	0	0	0	0	4.154385264	0	4.133253639	0	0	0	0
Cystoviridae	0	0	0	0	1.222489997	5.900812276	0.492689364	5.993541247	0	0	0.812981525	1.578163847
Flaviviridae	2.590271949	10.82214037	19.48575113	75.01963413	79.49597584	43.83503691	31.78971878	40.77647648	34.24142781	18.87345649	31.10861569	19.72543009
Genomoviridae	0	34.23076341	0	1067.712537	1556.818039	174.3766147	292.189793	560.0883138	365.6919777	89.9834819	77.93408993	85.62463463
Hepeviridae	15.38009639	15.8988739	45.01326577	27.2486781	23.3509174	0.739822033	18.86529712	0.53531554	14.9195091	10.07224878	6.873817589	11.64944646
Herpesviridae	11.92547363	3.822746099	12.68713002	19.50953948	28.83999754	22.78084706	22.5770464	17.14249043	22.35598929	8.138109164	15.80489545	4.551988982
Inoviridae	30.85224011	27.98907829	41.44544539	1602.934958	1086.886424	1185.677781	487.6159485	1253.823163	591.3883306	230.7518898	572.8015415	431.3771332
Iridoviridae	55.49479564	32.53469037	81.60914423	266.1328191	93.55864917	118.6090655	51.71224728	104.0619908	59.1207972	5826.207022	4745.609323	5566.451254
Lipothrixviridae	0	0	0	2.58968337	6.236832618	9.286591129	2.650290769	4.637412224	0.969617452	1.221272198	0.380465439	0.341194578
Malacoherpesviridae	0	0	0	14.24614381	17.48522566	2.919297753	8.331713221	1.448452241	7.768060378	5.81477184	3.565504686	3.398333129
Marseilleviridae	17.33176728	8.045779748	5.1576002	161.0844748	103.6290444	75.84724131	41.70996935	79.1871433	54.97974706	16.78012296	65.7505139	49.49146024
Metaviridae	8351.126095	7423.598167	13335.76124	57.62266886	49.82290964	0.308611477	19.50911445	2.786266949	37.50344476	5.885160461	6.676948611	8.480374709
Microviridae	0	3.430231991	0	87.35915823	116.7236726	9.094544138	40.91652111	29.0709156	38.58973115	13.47971469	20.50510444	26.04367816
Mimiviridae	81.87267388	41.03855958	76.08731832	4721.90489	3698.967686	2626.192896	1615.834178	2247.188023	2004.998163	769.2974866	1605.100099	1201.014039
Myoviridae	168.7635534	298.4550785	96.41151167	93312.78391	108327.6876	134952.1817	152222.1927	141322.2028	148485.7668	152514.5976	138993.93	141450.0237
Nimaviridae	1.142293841	0	0	37.01301408	31.48419532	8.390374525	12.21318791	9.951549134	8.041797055	8.090627053	11.62664572	9.027881388
Nudiviridae	0	0	0	9.40946467	14.85972811	0.892677825	8.897390287	0.645917924	11.35281065	1.360825794	3.262553308	1.583321246
Paramyxoviridae	48.80845785	35.37837322	51.24231781	25.68458626	30.03065759	0	22.85044957	0	21.08858056	15.99023697	21.25460765	17.45119236
Parvoviridae	0.639684551	5.234344417	0	1200.657605	1551.52265	274.231638	663.0156043	616.342467	665.5858051	119.8923724	143.9391846	140.912075
Phycodnaviridae	874.5866622	864.3278224	1123.941567	2878.47328	2273.816555	2133.305794	1154.980616	1462.457833	1271.638597	1906.813838	2195.874612	2261.754158
Picornaviridae	0	0	0	0	0	0.750097339	0	2.44237715	0	0	0	0
Pithoviridae	0	3.445614197	1.186869444	390.9177331	325.4631403	276.7120749	138.118099	233.2774809	128.4265862	76.95884356	138.0419025	132.589796
Podoviridae	48.29484052	175.0751994	22.75359225	6356.249079	6089.333767	4629.533182	4148.080569	5063.823669	4400.445214	16255.15529	14507.22073	15724.57232
Polydnaviridae	97.14445198	39.68577524	139.9527191	9.499676049	0	5.192981581	4.611452283	5.260504632	6.572063277	1.269550893	4.565585269	7.385614347
Potyviridae	0	0	0	33.28992796	38.97862056	4.258826991	16.47911003	4.919745283	14.69118456	6.965956719	10.49574743	7.720985151
Poxviridae	11.8425057	30.24789399	18.05652369	900.7885954	713.1158797	1265.14517	684.9401179	531.2702194	699.4006995	1860.985364	1950.533358	1933.058358
Retroviridae	8083.046105	7243.74975	11666.74435	82.1601571	55.14078697	11.1033651	37.54557744	15.07683853	25.98143573	14.08476218	13.43033246	29.67242262
Siphoviridae	70.28450019	219.5454966	52.58939567	42325.0842	48677.63911	66852.70598	69349.33615	66497.27221	67337.90649	78450.62428	72368.04193	75183.6814
Sphaerolipoviridae	0	0	0	22.89031793	36.99429373	21.9628501	11.30815937	30.70416989	16.62919782	3.668397534	2.495853281	6.575306944
Spiraviridae	0	0	0	15.92079874	5.419558544	0.389942299	3.822344564	0	7.003873932	2.254942381	8.109270587	0.87454206
norank_d__Viruses	192.0901303	332.3650536	148.1688464	100225.3277	118766.9251	111905.7914	131069.9794	117996.1543	128020.2893	101403.2241	95554.10484	93999.7848
norank_o__Caudovirales	23.63734159	82.30545989	9.221967912	9225.163394	9576.236084	17038.63011	15034.71643	12630.76672	15321.69689	60215.73063	52643.34791	56528.37563
