# Supplementary material for: Metagenomics of Virus Diversities in Solid-State Brewing Process of Traditional Chinese Vinegar
Source: Foods. 2022 Oct 21;11(20):3296. doi: 10.3390/foods11203296 (PMC9602057; doi:10.3390/foods11203296)
Supplement: Supplementary file 1 [file foods-11-03296-s001.zip › Supplementary file S3.xls]

ARO_accession	0d-1	0d-2	0d-3	8d-1	8d-2	8d-3	12d-1	12d-2	12d-3	18d-1	18d-2	18d-3	Resistence	Resistence_description
ARO:3000024	0	0	0	0.085849207	0.754916254	0	0.41670081	0	0.184737291	0.271990233	0	0	patA	PatA is an ABC transporter of Streptococcus pneumoniae that interacts with PatB to confer fluoroquinolone resistance.
ARO:3000027	0.156243354	0	0.476854566	1.309994536	2.081352774	0.898411623	0.421830645	0.607283927	1.407805998	0.690498254	0.498049729	0.232450801	emrA	EmrA is a membrane fusion protein, providing an efflux pathway with EmrB and TolC between the inner and outer membranes of E. coli, a Gram-negative bacterium.
ARO:3000074	0.24290959	0	0.121386807	1.617721001	1.312467404	1.286236309	1.14511336	0	0.942809653	0.533887078	0.351959858	0.045173544	emrB	emrB is a translocase in the emrB -TolC efflux protein in E. coli. It recognizes substrates including carbonyl cyanide m-chlorophenylhydrazone (CCCP), nalidixic acid, and thioloactomycin.
ARO:3000182	0	0	0	0	0	0	0	13.72998728	0	0	0	0	tetY	TetY is a tetracycline efflux pump found in Gram-negative bacteria (Aeromonas and Escherichia). It is associated with plasmid DNA.
ARO:3000205	0	0	0	0	0	0	0	21.68475025	0	0	0	0	tetX	TetX is a flavin-dependent monooxygenase conferring resistance to tetracycline antibiotics. Hydroxylates at position 11a of the tetraketide.
ARO:3000207	0	0	0	1.69241319	1.526241416	1.253411027	0.737350457	0	0.560251853	0.274723803	0.226728386	0.464901602	acrA	Protein subunit of AcrA-AcrB-TolC multidrug efflux complex. AcrA represents the periplasmic portion of the transport protein.
ARO:3000216	0.4356207	0	0.326532636	7.179593552	9.594040263	8.483257898	8.869375519	0.138615304	8.050039835	7.748501512	6.212840889	6.19749012	acrB	Protein subunit of AcrA-AcrB-TolC multidrug efflux complex. AcrB functions as a herterotrimer which forms the inner membrane component and is primarily responsible for substrate recognition and energy transduction by acting as a drug/proton antiporter.
ARO:3000230	0	0	0.349157557	0	0	0	0	366.8438438	0	0	0	0	ANT(2'')-Ia	Plasmid or integron-encoded nucleotidylylation of 2-deoxystreptamine aminoglycosides at the hydroxyl group at position 2'' in P. aeruginosa, K. pneumoniae, Morganella morganii, E. coli, S. typhimurium, C. freundii and A. baumannii
ARO:3000237	0	0.11479111	0.126065	0.889765344	1.121981929	1.13438377	0.796738741	0.160546325	0.557621254	0.055446285	0.546522238	0.516059638	tolC	TolC is a protein subunit of many multidrug efflux complexes in Gram negative bacteria. It is an outer membrane efflux protein and is constitutively open. Regulation of efflux activity is often at its periplasmic entrance by other components of the efflux complex.
ARO:3000309	0.160270245	0	0	1.711080788	1.588410938	1.401542491	0.946208562	0.802721122	1.496976136	0.6261604	0.547540828	0.291624313	emrD	EmrD is a multidrug transporter from the Major Facilitator Superfamily (MFS) primarily found in Escherichia coli. EmrD couples efflux of amphipathic compounds with proton import across the plasma membrane.
ARO:3000377	0.455011134	0.435086306	0.151585476	1.136350362	0.898797505	1.4759922	1.276781447	0.193047167	1.35849496	0	0.131856181	0.056411841	mexA	MexA is the membrane fusion protein of the MexAB-OprM multidrug efflux complex.
ARO:3000378	0	0	0	1.486885249	1.983493377	1.991523165	1.873086775	3.022080676	1.525333347	1.175150324	0.441121585	0.605241057	mexB	MexB is the inner membrane multidrug exporter of the efflux complex MexAB-OprM.
ARO:3000379	0.741779381	0.118686218	0.745815339	3.925460873	4.669866386	3.654870901	2.544461827	2.046965649	3.124434704	0.9750596	1.509200009	1.683757111	oprM	OprM is an outer membrane factor protein found in Pseudomonas aeruginosa and Burkholderia vietnamiensis. It is part of the MexAB-OprM, MexVW-OprM, MexXY-OprM and the AmrAB-OprM complex.
ARO:3000410	0	0	0	0.119416545	0	0.061587299	0.072454034	3.560350864	0.064242553	0	0.062354134	0	sul1	Sul1 is a sulfonamide resistant dihydropteroate synthase of Gram-negative bacteria. It is linked to other resistance genes of class 1 integrons.
ARO:3000412	0	0	0	0	0.079694415	0	0.076982411	24.44317804	0.068257712	0	0	0	sul2	Sul2 is a sulfonamide resistant dihydropteroate synthase of Gram-negative bacteria, usually found on small plasmids.
ARO:3000491	0	0	0	1.176071263	1.205088915	0.920060889	1.104484379	0	1.372458495	0.748089131	0.316113109	0.425520675	acrD	AcrD is an aminoglycoside efflux pump expressed in E. coli. Its expression can be induced by indole, and is regulated by baeRS and cpxAR.
ARO:3000518	0	0	0.88364993	3.268906439	4.412232888	2.36151881	2.381243638	1.86672968	3.783197293	1.29366525	1.19405128	0.657175496	CRP	CRP is a global regulator that represses MdtEF multidrug efflux pump expression.
ARO:3000533	0	0.61143234	0	3.191190212	3.565050441	3.743857845	5.321428318	15.4204327	3.678357753	1.76587144	1.614902693	1.497950188	macA	MacA is a membrane fusion protein that forms an antibiotic efflux complex with MacB and TolC.
ARO:3000535	0	0.300684	0	3.391537036	2.324541834	2.825676575	2.537459102	18.94579624	2.613046635	1.416909675	1.029538838	0.953243287	macB	MacB is an ATP-binding cassette (ABC) transporter that exports macrolides with 14- or 15- membered lactones. It forms an antibiotic efflux complex with MacA and TolC.
ARO:3000561	0	0.146819247	0	2.68421855	3.104343452	2.461058889	2.895298964	0	2.979744089	1.079901962	2.091249884	1.199273947	tet30	Tet30 is a tetracycline efflux pump found in agrobacterium, a Gram-negative bacterium.
ARO:3000573	0	0	0.127880751	0.213033218	0.624436901	0.329606101	0.603187284	0	0.534825862	0.224979575	0.704499075	0.142770708	tet43	Tet(43) is a tetracycline resistance gene with unknown origins, isolated from metagenomic DNA.
ARO:3000582	0	0	0	0.486111456	1.024365901	0.850650515	5.543143095	10.90683323	2.398236866	0.28444352	0.866523754	0.807135407	L1 beta-lactamase	L1 is an Ambler class B MBL; subclass B3 originally isolated from Stenotrophomonas maltophilia. It has activity against a broad range of beta-lactams and is only active with two Zn(II) ions in the active site.
ARO:3000753	0.410913139	0	0	1.330284524	1.050421546	1.450557247	0.691824308	23.20360966	0.695206305	0.120418583	0.079384779	0.152833842	abeM	AbeM is an multidrug efflux pump found in Acinetobacter baumannii.
ARO:3000774	1.403800659	0.890457582	1.27663571	38.64137416	36.18755291	39.80490916	46.03462814	13.6284986	35.5717025	26.86017161	25.12442386	22.86725079	adeA	AdeA is the membrane fusion protein of the multidrug efflux complex AdeABC.
ARO:3000775	0	0	0	0.53084687	0.598291925	1.341426894	4.13708852	0	0.993245476	0.218199003	0.35358641	1.117593896	adeB	AdeB is the multidrug transporter of the adeABC efflux system.
ARO:3000777	0.296825083	0	0	0.78247762	0.569082795	0.594706951	0.849562452	0	0.841899422	0.26095483	0.387071844	0.607201436	adeF	AdeF is the membrane fusion protein of the multidrug efflux complex AdeFGH.
ARO:3000778	0	0	0	0.131221982	0.0412108	0.135351555	0.039808395	0	0.705935277	0.051967716	0.102777632	0.087942413	adeG	AdeG is the inner membrane transporter of the AdeFGH multidrug efflux complex.
ARO:3000779	0	0	0	0	0	0	0	1.215011774	0	0	0	0	adeH	AdeH is the outer membrane channel protein of the AdeFGH multidrug efflux complex.
ARO:3000780	0.16068438	0.429844302	0	3.673841272	3.926416645	3.20023605	2.528437155	46.44682817	3.417396611	1.51193343	1.802875997	1.051566868	adeI	AdeI is the membrane fusion protein of the AdeIJK multidrug efflux complex.
ARO:3000781	0	0	0	0.740920581	0.815363572	0.742816463	0.622273955	0	0.979239404	0.318908548	0.229129652	0.131809602	adeJ	AdeJ is a RND efflux protein that acts as the inner membrane transporter of the AdeIJK efflux complex. It has 57% identity with E. coli AcrB.
ARO:3000782	0	0	0	0	0	0	0	20.69851132	0	0	0	0.084411878	adeK	AdeK is the outer membrane factor protein in the adeIJK multidrug efflux complex.
ARO:3000783	0.581166869	0	0.435631157	7.337700243	6.128277106	7.40227534	8.75728882	0	6.76708237	4.406813714	4.168257313	4.323150408	cmeA	CmeA is the membrane fusion protein of the CmeABC multidrug efflux complex.
ARO:3000789	0	0	0	0	0	0	0	9.441672351	0	0.138756439	0	0	mdsA	MdsA is the membrane fusion protein of the multidrug and metal efflux complex MdsABC.
ARO:3000790	0.235129039	0.055885146	0.17507055	2.817870442	2.726596765	3.186951645	2.913104692	2.850876645	3.245510926	1.18775402	1.040898126	0.997615453	mdsB	MdsB is the inner membrane transporter of the multidrug and metal efflux complex MdsABC.
ARO:3000791	0	0	0	0.034930548	0.087760652	0	0	5.928189316	0	0	0	0	mdsC	MdsC is the outer membrane channel of the multidrug and metal efflux complex MdsABC.
ARO:3000792	0.332371742	0	0	1.792475415	2.115484159	1.5841676	1.464353276	0	1.001137172	0.758901238	0.810127801	0.292856904	mdtA	MdtA is the membrane fusion protein of the multidrug efflux complex mdtABC.
ARO:3000793	1.199262391	0.879199009	0.110784394	13.86870434	13.37895624	12.89482716	11.47710834	1.221534593	10.31023259	7.295854027	6.065817465	4.829179724	mdtB	MdtB is a transporter that forms a heteromultimer complex with MdtC to form a multidrug transporter. MdtBC is part of the MdtABC-TolC efflux complex.
ARO:3000794	1.840475982	1.427004575	1.059965461	66.64817632	69.42294332	72.83706988	70.91708907	17.50896532	72.72703141	89.75695687	97.75969503	95.02963298	mdtC	MdtC is a transporter that forms a heteromultimer complex with MdtB to form a multidrug transporter. MdtBC is part of the MdtABC-TolC efflux complex. In the absence of MdtB, MdtC can form a homomultimer complex that results in a functioning efflux complex with a narrower drug specificity.
ARO:3000796	0	0	0	0.191729896	0.426186874	0.141259758	0.205841857	0	0.300393032	0.303722427	0.17714805	0.036712468	mdtF	MdtF is the multidrug inner membrane transporter for the MdtEF-TolC efflux complex.
ARO:3000800	0.161939726	0	0.161849076	1.258227445	1.354805063	1.575929172	0.817938114	3.116728568	0.821936621	0.56947955	0.281567887	0.24092557	mexC	MexC is the membrane fusion protein of the MexCD-OprJ multidrug efflux complex.
ARO:3000801	0.089862507	0.84829561	0.797975238	14.03686368	15.7555742	15.61310572	18.39768921	0.571888283	14.98549976	9.57845638	7.960587475	7.57346174	mexD	MexD is the multidrug inner membrane transporter of the MexCD-OprJ complex.
ARO:3000802	0	0	0	0	0	0	0	2.029470216	0	0	0	0	oprJ	OprJ is the outer membrane channel component of the MexCD-OprJ multidrug efflux complex.
ARO:3000803	0	0	0	1.231728045	1.174609315	1.227498584	0.670467499	2.684081941	0.685939573	0.201982895	0.088770171	0.227870489	mexE	MexE is the membrane fusion protein of the MexEF-OprN multidrug efflux complex.
ARO:3000804	1.239587928	1.224337232	1.205518523	52.33702269	51.15659265	52.8045972	53.2524564	36.73646346	52.71154133	49.1113675	50.27830235	45.24745433	mexF	MexF is the multidrug inner membrane transporter of the MexEF-OprN complex.
ARO:3000805	0	0	0.129479261	6.949064672	7.202235806	6.930972836	9.461917049	11.22957966	6.911199272	3.932274239	4.765706076	4.678251624	oprN	OprN is the outer membrane channel component of the MexEF-OprN multidrug efflux complex.
ARO:3000808	0	0	0	0	0	0	0.028258051	0.53407111	0	0	0	0	mexI	MexI is the inner membrane transporter of the efflux complex MexGHI-OpmD.
ARO:3000810	0	0	0.12430009	0.586693483	0.563598906	0.533961884	0.376905883	0.316597354	0.33418976	0.218680147	0.108122068	0.416319384	mtrC	MtrC is the membrane fusion protein of the MtrCDE multidrug efflux complex.
ARO:3000811	0	0	0	0.274973499	0.106651321	0.520535846	0.255254791	0	0.410037788	0.30260168	0.065505985	0.113795103	mtrD	MtrD is the inner membrane multidrug transporter of the MtrCDE efflux complex.
ARO:3000813	0.18343615	0	0.183333466	1.580730474	1.66215861	1.417597922	1.111454491	11.18767775	0.657207001	0.161268545	0.106314718	0.06822671	mexS	MexS is a suppressor of MexT, which is an activator of the multidrug pump MexEF-OprN. Mutations in MexS lead to multidrug resistance.
ARO:3000814	0	0	0	0	0	0	0	25.90341985	0	0	0	0	mexT	MexT is a LysR-type transcriptional activator that positively regulates the expression of MexEF-OprN and OprD.
ARO:3000820	0	0	0	0	0	0	0	5.957477086	0	0	0	0	nfxB	NfxB is a repressor of the efflux pump mexCD-oprJ and itself.
ARO:3000828	0	0	0	2.930043385	2.152902299	2.941315463	3.69401005	0	2.778390822	1.737395237	1.756220039	0.882032594	baeR	BaeR is a response regulator that promotes the expression of MdtABC and AcrD efflux complexes.
ARO:3000829	0.136971046	0.818222165	0.136894372	1.352333559	2.485940893	1.821182342	1.974123105	1.042637644	1.711588113	0.975589514	0.712750577	1.0353504	baeS	BaeS is a sensor kinase in the BaeSR regulatory system. While it phosphorylates BaeR to increase its activity, BaeS is not necessary for overexpressed BaeR to confer resistance.
ARO:3000830	0.461120024	0.413257387	0.405326381	2.407851294	0.834584572	1.838933388	1.350507845	1.032382675	1.524538593	0.652767324	0.847278171	0.142170831	cpxA	CpxA is a membrane-localized sensor kinase that is activated by envelope stress. It starts a kinase cascade that activates CpxR, which promotes efflux complex expression.
ARO:3000831	0.235548693	0.765602512	2.224528069	3.521705906	4.028695674	3.224556732	1.966540663	3.602936539	3.384131295	0.703906053	1.679009065	1.406578674	cpxR	CpxR is a regulator that promotes acrD expression when phosphorylated by a cascade involving CpxA, a sensor kinase.
ARO:3000833	0	0.049592823	0.065976693	0.633858365	0.615471915	0.57553277	0.641296389	0.336090609	0.695505953	0.518643034	0.503767853	0.278846681	evgS	EvgS is a sensor protein that phosphorylates the regulatory protein EvgA.
ARO:3000838	0	0	0	1.130285416	1.703859642	1.39902677	5.303382149	0	3.16191185	3.939107455	2.596818239	3.029980963	arlR	ArlR is a response regulator that binds to the norA promoter to activate expression. ArlR must first be phosphorylated by ArlS.
ARO:3001037	0.650015906	0	0	0.240497431	0.075529202	0.124032958	0.218876819	31.16332837	0	0.571463799	0.251154631	0.483530063	TEM-171	TEM-171 is a beta-lactamase.
ARO:3001216	0	0	0	0.722751442	0.96467795	0.978464185	1.479996923	0	0.777637604	0.930249317	0.613257806	0.06054674	mdtH	Multidrug resistance protein MdtH
ARO:3001293	0.191338015	0	0	10.66904432	8.983354726	10.19609673	12.2050034	3.434315157	8.961229433	5.675240075	5.465299983	5.662741347	desR	B-Glycosidase involved in Streptomyces venezuelae self-resistance. This organism produces pikromycin/narbomycin/methymycin/neomethymycin which are inactivated by a glucosyltransferase inside the cell. DesR is a secreted enzyme that re-activates the antibiotic by removing the glucose once it is pumped out of the cell.
ARO:3001297	0	0.072074903	0.150666776	0.292823842	0.761975211	0.345187481	0.431474748	0	0.562609024	0.132533423	0.262114105	0.028034975	oleR	B-Glycosidase involved in Streptomyces antibioticus self-resistance. This organism produces oleandomycin which is inactivated by glucosyltransferase (OleI or OleD) inside the cell. OleR is a secreted enzyme that re-activates the antibiotic by removing the glucose once it is pumped out of the cell.
ARO:3001327	0	0.126514458	0	1.031531555	0.830313887	0.87512721	0.799676457	0.168402848	0.682467203	0.405154102	0.471187594	0.516470599	mdtK	A multidrug and toxic compound extrusions (MATE) transporter conferring resistance to norfloxacin, doxorubicin and acriflavine.
ARO:3001330	0.530361236	0.254111396	0.133083608	1.284148801	0.739514843	1.326336517	1.60215747	0.168761916	1.304852337	1.103428984	1.149099293	0.737215949	mdtD	Efflux pump mdtD
ARO:3001522	0	0	0	0	0	0	0	27.05468295	0.067513083	0	0	0	OXA-334	OXA-334 is a beta-lactamase. From the Lahey list of OXA beta-lactamases.
ARO:3001555	0	0	0	0	0	0	0	16.53119094	0	0	0	0	OXA-368	OXA-368 is a beta-lactamase found in Aeromonas sobria. From the Lahey list of OXA beta-lactamases.
ARO:3002120	0	0.154446221	0.161428689	1.210139346	2.026929133	1.20199212	0.598263306	0	1.253814396	0.284000191	0.04680609	0.060074947	CMY-108	CMY-108 is a beta-lactamase present in plasmids of clinical Escherichia coli from humans and companion animals in the upper Midwestern USA . From the Lahey list of CMY beta-lactamases.
ARO:3002489	0.484557311	0	0	0.986039467	1.576500437	1.017070255	0.97897632	1.027913486	1.687827071	0.213000143	0.280836542	0.300374736	LRA-10	LRA-10 is a beta-lactamase isolated from soil samples in Alaska
ARO:3002494	0.164946565	0	0	1.052734445	0.574983581	1.085864132	1.055292039	0	0.7879511	1.305120242	0.430193906	0.42944823	SRT-2	SRT-2, isolated from Serratia marcescens, is a chromosomal beta-lactamase that confers resistance to cefotaxime
ARO:3002522	0	0	0.098183326	1.863893954	2.658923452	2.65726752	1.751053669	0	1.909326698	0.494256194	0.734083763	1.091246162	novA	A type III ABC transporter, identified on the novobiocin biosynthetic gene cluster, involved in the transport and resistance of novobiocin.
ARO:3002539	0	0	0	0	0	0	0	30.41933529	0	0	0	0	AAC(3)-IV	AAC(3)-IV is a plasmid-encoded aminoglycoside acetyltransferase in E. coli, C. jejuni and P. stutzeri
ARO:3002580	0.281379434	0	0	0.078080048	0.098085434	0	0	174.0569162	0	0	0	0	AAC(6')-Ib9	AAC(6')-Ib9 is an integron-encoded aminoglycoside acetyltransferase in P. aeruginosa
ARO:3002639	0	0	0	0	0.080883884	0.132826339	0	20.67333466	0	0	0.067240092	0	APH(3'')-Ib	APH(3'')-Ib is an aminoglycoside phosphotransferase encoded by plasmids, transposons, integrative conjugative elements and chromosomes in Enterobacteriaceae and Pseudomonas spp.
ARO:3002641	0	0	0	0	0	0	0	22.11525633	0	0	0	0	APH(3')-Ia	APH(3')-Ia is a transposon-encoded aminoglycoside phosphotransferase in E. coli and S. enterica. It is identical at the protein sequence to APH(3')-Ic, an aminoglycoside phosphotransferase encoded by plasmids, transposons and genomic islands in K. pneumoniae, A. baumannii, S. marcescens, Corynebacterium spp., Photobacterium spp. and Citrobacter spp.
ARO:3002646	0.450614891	0.52854929	0	0.062520618	1.051032024	0.06448815	5.049689126	12.63589217	0.339332061	0.783075648	0.201720277	0.085662425	APH(3')-IIc	APH(3')-IIc is a chromosomal-encoded aminoglycoside phosphotransferase in S. maltophilia
ARO:3002655	0	0	0	0	0	0	0	18.0516035	0	0	0	0	APH(4)-Ia	APH(4)-Ia is a plasmid-encoded aminoglycoside phosphotransferase in E. coli
ARO:3002660	0	0.213124714	0	0.123696707	0.077694914	0.127589459	0.075050952	24.96466588	0.133090307	0	0	0	APH(6)-Id	APH(6)-Id is an aminoglycoside phosphotransferase encoded by plasmids, integrative conjugative elements and chromosomal genomic islands in K. pneumoniae, Salmonella spp., E. coli, Shigella flexneri, Providencia alcalifaciens, Pseudomonas spp., V. cholerae, Edwardsiella tarda, Pasteurella multocida and Aeromonas bestiarum
ARO:3002670	0.552754266	1.243970609	0.520084059	5.216336731	5.815974693	6.935133027	6.773364157	0	5.330740117	2.637683133	2.412765824	1.657191578	cat	cat is used to describe many variants of the chloramphenicol acetyltransferase gene in a range of organisms including Acinetobacter calcoaceticus, Agrobacterium tumefaciens, Bacillus clausii, Bacillus subtilis, Campylobacter coli, Enterococcus faecalis, Enterococcus faecium, Lactococcus lactis, Listeria monocytogenes, Listonella anguillarum
ARO:3002679	0.301868228	0	0	0.418827444	0.526137888	0.345606397	0.406586713	0	0.630886818	0	0.787296615	0.224551987	catB7	catB7 is a chromosome-encoded variant of the cat gene found in Pseudomonas aeruginosa
ARO:3002813	0.66228125	0.126514458	0.132234139	4.461281999	3.56911562	4.204531971	7.721183015	0	5.277438252	3.472241019	4.151296886	4.142360179	lmrB	lmrB is a chromosomally-encoded efflux pump that confers resistance to lincosamides in Bacillus subtilis
ARO:3002881	0	0	0	1.35279805	1.246231835	1.116296622	2.079329785	0	1.196769369	1.190549582	1.506927784	0.322353375	lmrC	lmrC is a chromosomally-encoded efflux pump that confers resistance to lincosamides in Streptomyces lincolnensis and Lactococcus lactis. It can dimerize with lmrD
ARO:3002882	0	0	0	1.780322459	1.484591613	1.829958242	3.98717124	0	2.538855803	2.381484562	2.582838462	2.031392333	lmrD	lmrD is a chromosomally-encoded efflux pump that confers resistance to lincosamides in Streptomyces lincolnensis and Lactococcus lactis. It can dimerize with lmrC
ARO:3002983	0.665585535	0.398588789	0.099122879	15.17768787	14.14387232	14.87316751	14.21899935	1.045287459	13.04569379	8.815533957	7.06536945	6.453514371	amrB	amrB is the membrane fusion protein of the AmrAB-OprM multidrug efflux complex.
ARO:3002985	0.094219477	0.335439987	0.727272068	2.182054336	1.984104245	1.995973476	1.376096757	0.619968708	1.875298308	1.223065069	0.464160395	0.374517513	arnA	arnA modifies lipid A with 4-amino-4-deoxy-L-arabinose (Ara4N) which allows gram-negative bacteria to resist the antimicrobial activity of cationic antimicrobial peptides and antibiotics such as polymyxin. arnA is found in E. coli and P. aeruginosa.
ARO:3002986	0.683350055	0	0	1.137737847	1.349842407	1.955904337	1.534008478	0	1.156130631	0.700897908	0.726094477	0.338884318	bacA	bacA is a gene that recycles undecaprenyl pyrophosphate during cell wall biosynthesis which confers resistance to bacitracin
ARO:3003030	0	0	0	0.315652878	0	0.217057676	0	2.050500996	0.33962374	0.333353883	0	0.119838625	mexV	MexV is the membrane fusion protein of the MexVW-OprM multidrug efflux complex.
ARO:3003031	0	0	0	0.016560164	0	0	0.06028565	7.902618568	0.034381663	0	0	0	mexW	MexW is the RND-type membrane protein of the efflux complex MexVW-OprM.
ARO:3003033	0	0	0	0.278003193	0.124767416	0.101009465	0.123900685	0	0.108360495	0.040436418	0.026657315	0.066562331	mexY	MexY is the RND-type membrane protein of the efflux complex MexXY-OprM.
ARO:3003049	0.887989195	0.316516219	0.498928956	10.25416263	10.28817073	11.72704556	13.45046578	8.092120862	11.04019684	7.123676337	6.627226951	5.311137698	rosB	rosB is a potassium antiporter in Yersinia that confers resistance to cationic antimicrobial peptides such as polymyxin B
ARO:3003051	0.22051367	0.514219163	0.313098464	89.21811992	89.73103723	91.36837547	87.71323307	16.27027744	93.04903895	99.5443494	103.0993184	98.21711223	smeA	smeA is the membrane fusion protein of the smeABC multidrug efflux complex in Stenotrophomonas maltophilia
ARO:3003052	0	0.131552644	0	0.226838288	0.221943781	0.209251373	0.15352121	1.050654935	0.107942429	0.340351639	0	0.403410256	smeB	smeB is the inner membrane multidrug exporter of the efflux complex smeABC in Stenotrophomonas maltophilia
ARO:3003053	0	0	0.128144423	3.007283544	4.583333855	3.894534632	6.0933328	9.222910198	3.223826653	4.190267234	2.97225856	1.923522349	smeC	smeC is an outer membrane multidrug efflux protein of the smeABC complex in Stenotrophomonas maltophilia
ARO:3003055	0.305667101	0.248794122	0	3.945760223	4.293359612	5.615849063	7.296131274	15.78380364	5.299642684	2.700823403	2.924252816	1.414068629	smeD	smeD is the membrane fusion protein of the smeDEF multidrug efflux complex in Stenotrophomonas maltophilia
ARO:3003056	0	0	0	0.42730416	0.717934806	0.558822032	3.54684505	2.747904711	0.649921044	0.448467444	0.613672229	0.289743234	smeE	smeE is the RND protein of the efflux complex smeDEF in Stenotrophomonas maltophilia
ARO:3003057	0	0	0	1.183927823	3.050756968	2.175720003	4.626022164	7.724113217	2.580503621	1.882050615	1.555963875	1.724087014	smeF	smeF is an outer membrane multidrug efflux protein of the smeDEF complex in Stenotrophomonas maltophilia
ARO:3003066	0.272740592	0	0	3.326096899	3.032448494	2.961703153	5.473584462	15.82986769	2.358644993	2.753309824	2.28862502	1.723637759	smeR	smeR is the responder component of a two component signal transduction system that includes smeS
ARO:3003067	0	0.254110235	0	1.574846434	3.462112772	1.792221499	4.294196466	10.37624966	1.617648351	1.348955933	1.745341627	2.168283371	smeS	smeS is the protein kinase sensor component of a two component signal transduction system that includes smeR
ARO:3003092	0	0	0	1.235939398	0.975966197	0.983798289	2.744731351	0	1.785718958	1.288221411	1.993911575	1.184204974	Enterococcus faecium cls conferring resistance to daptomycin	cls or cardiolipin synthetase is an inner membrane protein that is involved in membrane synthesis. Specific mutations in Enterococcus can confer resistance to daptomycin.
ARO:3003285	0.205304701	0.398773515	0.232553957	28.76689232	26.09241086	28.66923302	25.99019422	0.339696731	28.71624322	25.19892538	27.73429095	23.48301745	Staphylococcus aureus rpoB mutants conferring resistance to rifampicin	Point mutations that occurs in Staphylococcus aureus rpoB resulting in resistance to rifampicin
ARO:3003295	0.065873787	0.279443993	0.197510737	2.612673132	1.872650042	2.127710877	2.216632052	8.914987022	1.705969987	0.455574065	0.795038481	0.683681962	Mycobacterium tuberculosis gyrA conferring resistance to fluoroquinolones	Point mutation of Mycobacterium tuberculosis gyrA resulted in the lowered affinity between fluoroquinolones and gyrA. Thus, conferring resistance.
ARO:3003318	0	0	0	0.334943644	0.836802145	0.516288262	0.339002054	0	0.399162219	0.060076964	0.225083341	0.03472801	Streptomyces rishiriensis parY mutant conferring resistance to aminocoumarin	point mutation on the Streptomyces rishiriensis parY resulting in aminocoumarin resistance
ARO:3003359	2.975350349	3.65296912	3.444566165	147.64996	134.601835	138.434887	139.22319	57.81241158	143.2846822	89.58053844	97.70015012	92.21679344	Streptomyces cinnamoneus EF-Tu mutants conferring resistance to elfamycin	Sequence variants of Streptomyces cinnamoneus elongation factor Tu that confer resistance to elfamycin antibiotics.
ARO:3003373	1.162359119	0.834893203	0	2.502348331	2.23135314	3.497948798	1.864159461	2.597695287	2.087900504	3.077614475	1.69205115	0.758082998	Klebsiella pneumoniae acrR mutant resulting in high level antibiotic resistance	AcrR is a repressor of the AcrAB-TolC multidrug efflux complex. AcrR mutations result in high level antibiotic resistance.
ARO:3003392	0.930405869	0.752720041	0.980825356	16.60867478	16.24265885	15.52625625	17.44881245	20.56776239	15.57738202	5.675233756	5.729888452	4.707468339	Mycobacterium tuberculosis katG mutations conferring resistance to isoniazid	katG is a catalase-peroxidase that catalyzes the activation of isoniazid. Isoniazid inhibits mycolic acid synthesis, which prevents cell wall synthesis in mycobacteria. Mutations in katG results in inability to activate isoniazid. Over 280 different mutations have been documented in PubMed for katG, with mutations to Ser315 being the most prevalent.
ARO:3003459	0.091448316	0.087443816	0.18279425	39.46163233	35.74196902	37.37561177	46.79572571	0.58198043	42.34241761	49.77752508	56.85961362	55.00202761	Mycobacterium tuberculosis gyrB mutant conferring resistance to fluoroquinolone	Point mutation in Mycobacterium tuberculosis gyrB resulting in fluoroquinolone resistance
ARO:3003551	0	0	0	0.699424823	1.203782123	1.261496245	2.803144501	0	1.972058864	2.199289552	2.498379015	1.047842782	emeA	A multidrug efflux pump from Enterococcus faecalis. There exist efflux activity of several antimicrobial agents such as DAPI, Hoechst 33342 and acriflavine. Efflux of DAPI via EmeA was strongly inhibited by reserpine.
ARO:3003558	0.20388477	0	0.20377064	0.33945621	0.852860892	0.17506947	0.068653166	0.519012055	0.060872452	0.089623011	0	0.07583231	y56 beta-lactamase	Class A beta-lactamase found in Yersinia enterocolitica biovar 1A
ARO:3003576	0.341086607	0.528599064	0.120914485	2.813093684	2.26892538	2.311208186	3.09148209	8.884637069	2.377029069	0.914658071	0.6298747	0.786033824	PmrC	PmrC mediates the modification of Lipid A by the addition of 4-amino-4-deoxy-L-arabinose (L-Ara4N) and phosphoethanolamine, resulting in a less negative cell membrane and decreased binding of polymyxin B.
ARO:3003577	0.319716478	0.364051807	0	4.142885476	3.984454323	4.064048118	3.538103507	21.52125344	5.619013843	1.697396656	1.199591357	1.751916231	PmrE	PmrE is required for the synthesis and transfer of 4-amino-4-deoxy-L-arabinose (Ara4N) to Lipid A, which allows gram-negative bacteria to resist the antimicrobial activity of cationic antimicrobial peptides and antibiotics such as polymyxin
ARO:3003578	0.868657619	0.424727108	0	5.518169574	4.884150591	4.471693522	2.015837096	1.238482331	2.541742077	1.064704764	0.43293588	0.210262315	PmrF	PmrF is required for the synthesis and transfer of 4-amino-4-deoxy-L-arabinose (Ara4N) to Lipid A, which allows gram-negative bacteria to resist the antimicrobial activity of cationic antimicrobial peptides and antibiotics such as polymyxin
ARO:3003583	0	0.167027514	0.135403148	3.093314939	2.677160258	3.334684728	2.848640984	0.889318409	3.195532924	2.142166865	1.214407303	0.904571675	PmrB	Histidine protein kinase sensor Lipid A modification gene; part of a two-component system involved in polymyxin resistance that senses high extracellular Fe(2+)
ARO:3003665	0	0	0.205794851	1.142760972	0.215333255	0.648298093	0.762686665	0	0.86068003	0.362053224	0.596700157	0.382928058	NmcR	NmcR is a homolog of the LysR regulator found in Enterobacter cloacae that contribute to the regulation of NmcA beta-lactamase
ARO:3003679	0.526679689	0.491971037	0.167973095	10.17902504	11.4031888	16.09348081	12.43671897	3.270633819	11.69701616	4.659506585	6.853815076	5.178290758	TriA	TriA is a membrane protein that is fused to TriB and both are required for the triclosan efflux pump function of TriABC-OpmH in P. aeruginosa.
ARO:3003680	1.205803156	0.659774062	0.861284815	12.2973679	12.1098878	12.04364376	15.5417184	3.547392322	11.5355713	7.951103332	8.982736707	9.671038467	TriB	TriB is a membrane protein that is fused to TriA and both are required for the triclosan efflux pump function of TriABC-OpmH in P. aeruginosa.
ARO:3003681	0.189780839	0.962849532	1.536280615	14.32820258	13.18663731	15.04364556	13.94404612	16.11831475	12.58080635	73.27155096	58.06415471	59.52346547	TriC	TriC is a resistance nodulation cell division (RND) transporter that is a part of TriABC-OpmH, a triclosan-specific efflux protein.
ARO:3003682	0	0	0	1.305274756	1.21101303	1.378886637	0.428828207	1.15909073	1.100755521	0.109559192	0.402523097	0.602555332	OpmH	OpmH is an outer membrane efflux protein required for triclosan-specific efflux pump function.
ARO:3003692	0	0	0	1.280300982	0.484824055	0.99698513	2.647682336	14.32299931	1.885687226	0.654038948	0.88588372	0.063366725	mexJ	mexJ is the membrane fusion protein of the MexJK multidrug efflux protein.
ARO:3003693	0.122531734	0.058583049	0.55331305	7.083858344	8.362215187	7.67632663	6.264748989	22.87064023	7.528877961	1.961806999	2.100074572	1.777342877	mexK	mexK is the inner membrane resistance-nodulation-cell division (RND) transporter in the MexJK multidrug efflux protein.
ARO:3003704	0	0	0	0	0	0	0	7.894691045	0	0	0	0	mexM	mexM is the membrane fusion protein of the MexMN-OprM multidrug efflux complex.
ARO:3003705	0.405705736	0.378737548	0	11.97384357	10.48639825	11.42683387	12.88503765	9.635571635	10.32245024	9.037808753	6.748448613	6.040482114	mexN	MexN is the inner membrane transporter of the MexMN-OprM multidrug efflux complex.
ARO:3003730	0.379506415	0.144154495	0.643702516	5.463529304	3.464057119	4.178295622	4.393513158	8.641176976	5.259836591	3.123883364	2.575732364	1.725493215	Bifidobacteria intrinsic ileS conferring resistance to mupirocin	Bifidobacteria have an intrinsically resistant form of ileS (isoleucyl-tRNA synthetase) that confers resistance to mupirocin.
ARO:3003744	0	0	0.591905191	0.328679822	0.103223243	0.508535128	0	0	0.353639958	0	0.429055827	0	vatF	vatF is a streptogramin A acetyl transferase gene isolated from the chromosome of Yersinia enterocolitica.
ARO:3003749	0.229041823	0.328518205	0.22891361	3.336735767	1.796426602	4.359541472	3.509150333	0	3.48755428	1.459881277	1.294278905	0.894486093	salA	salA is an ABC transporter gene isolated from the chromosome of Staphylococcus sciuri conferring resistance to lincosamides and streptogramins.
ARO:3003772	0.588213495	0.631832479	0.220651048	16.17048117	15.74211923	17.56792395	16.83189638	7.238207345	15.76605987	6.665988377	7.19955749	5.462051217	Brucella suis mprF	MprF is a integral membrane protein that modifies the negatively-charged phosphatidylglycerol on the membrane surface. This confers resistance to cationic peptides that disrupt the cell membrane, including defensins.
ARO:3003774	0	0	0	0.060475551	0.253234591	0.062378725	0.342463809	0	0.151825566	0.255467462	0.463139701	0.2701969	Streptococcus agalactiae mprF	MprF is a integral membrane protein that modifies the negatively-charged phosphatidylglycerol on the membrane surface. This confers resistance to cationic peptides that disrupt the cell membrane, including defensins.
ARO:3003784	0.878944005	0.564622983	0.732566411	78.42868345	82.04943856	80.69351697	78.35625031	30.29675152	76.0897153	50.88854836	59.66186013	54.99786304	Mycobacterium tuberculosis murA	Mycobacterium tuberculosis murA confers intrinsic resistance to fosfomycin. The presence of an aspartic acid residue in place of the critical cysteine at position 117 that enables fosfomycin binding is believed to be responsible for this intrinsic resistance.
ARO:3003785	0.135774793	0.376340475	0.145210386	1.420014932	1.281945701	0.929443344	2.052787082	0	1.274429822	0.063866865	0.768405414	0.177731641	Chlamydia trachomatis murA	Chlamydia murA confers intrinsic resistance to fosfomycin. The presence of an aspartic acid residue in place of the critical cysteine at position 119 that enables fosfomycin binding is believed to be responsible for this intrinsic resistance.
ARO:3003830	5.17987409	4.565044038	3.523162246	140.7622378	137.5501985	142.6229532	144.3314038	20.82218861	133.8278099	94.45722152	105.1469767	93.27563644	aminocoumarin resistant alaS	alanyl-tRNA synthetase conferring resistance to novobiocin in Escherichia coli
ARO:3003840	0.606362559	0.628406944	0.95615454	6.525468102	5.638197445	6.663765782	3.675235581	4.668365517	5.201833126	1.017432447	1.301060619	0.957846811	aminocoumarin resistant cysB	Positive regulator of gene expression in the cysteine regulon. cysB mutants confer resistance to novobiocin, an aminocoumarin antibiotic, in Escherichia coli.
ARO:3003841	0	0	0	0.766919586	0.770733547	1.1074765	0.837568629	0	0.825159902	0.242977941	0.160180842	0.308384729	kdpE	kdpE is a transcriptional activator that is part of the two-component system KdpD/KdpE that is studied for its regulatory role in potassium transport and has been identified as an adaptive regulator involved in the virulence and intracellular survival of pathogenic bacteria. kdpE regulates a range of virulence loci through direct promoter binding.
ARO:3003844	0.910855263	1.049693403	1.070609985	50.56150732	52.29266117	55.49760461	64.17066965	17.34834536	59.89695188	51.48089953	58.17620266	53.14245778	mfd	mfd dissociates transcription elongation complexes blocked at nonpairing lesions and mediates recruitment of DNA repair proteins. The Mfd (mutation frequency decline) protein, also known as transcription-repair coupling factor, is responsible for ATP-dependent removal of stalled RNA polymerase from DNA lesions by inducing forward movement of the RNA polymerase and subsequent recruitment of nucleo…
ARO:3003848	0	0	0	0	0	0	0	2.609318849	0	0	0	0	ADC-2	ADC-2 is a beta-lactamase found in Oligella urethralis.
ARO:3003889	0.695580033	0.13302415	0	1.158100046	1.115365242	0.955636482	0.421594947	0.354135742	1.412186409	0.183456499	0.201569852	0.103484808	Escherichia coli mutant GlpT conferring resistance to fosfomycin	Mutations to the active importer GlpT, which is involved with the uptake of many phosphorylated sugars, confer resistance to fosfomycin by reducing import of the drug into the bacteria.
ARO:3003890	0.361539855	0.125446825	0	0.974876254	1.110857728	1.28761783	0.464357056	0	1.196020331	0.230675261	0.209538892	0.415325327	Escherichia coli mutant UhpT conferring resistance to fosfomycin	Mutations to the active importer UhpT, which is involved with the uptake of many phosphorylated sugars, confer resistance to fosfomycin by reducing import of the drug into the bacteria.
ARO:3003896	0	0.127874828	0.133656011	1.558578513	0.978955916	0.842090426	0.135091714	0	1.117958576	0.058784986	0.155013718	0.049739472	Pseudomonas mutant PhoQ conferring resistance to colistin	Mutations in Pseudomonas aeruginosa PhoQ of the two-component PhoPQ regulatory system. Presence of mutation confers resistance to colistin
ARO:3003905	0	0.959061211	0	1.66990555	2.010355899	2.870762817	1.097620179	0	1.19781276	0.551109242	0.653964124	0	ANT(4')-Ib	Kanamycin nucleotidyltransferase sequence from Staphylococcus aureus plasmid. Confers resistance to kanamycin, neomycin and other aminoglycosides
ARO:3003922	1.753277515	0.295829826	0.463806307	23.44686215	22.87069118	19.24979939	25.31833878	6.604262581	23.51407824	18.49332009	15.40968728	14.67201686	oqxA	RND efflux pump conferring resistance to fluoroquinolone
ARO:3003923	0	0.295976355	0.516482369	9.251282872	10.05202501	8.946700564	10.62694917	1.206544793	8.905056948	4.825727959	4.900536215	5.091028842	oqxB	RND efflux pump conferring resistance to fluoroquinolone
ARO:3003937	0.435719205	0.095444294	0.630788594	9.297593857	8.694876846	9.533783956	12.96238439	13.42268212	9.325270058	7.029801638	6.711045493	6.06927563	Neisseria meningititis PBP2 conferring resistance to beta-lactam	Point mutation in Neisseria meningititis PBP2 (penA) decreases affinity between beta-lactam antibiotic molecule and PBP2, thereby conferring resistance to beta-lactam.
ARO:3003942	2.250590971	1.659094238	5.445321733	9.556337135	7.496110197	8.902713452	7.463588346	0.504135914	7.910542216	4.39470954	5.159288171	3.479277425	abcA	AbcA is a multidrug resistant ABC transporter that confers resistance to methicillin, daptomycin, cefotaxime, and moenomycin.
ARO:3003950	0.353343909	0.194002594	0	4.798588904	4.037526917	3.957817538	3.488066424	9.336427222	4.320062914	1.354522154	0.952149634	1.162124572	msbA	MsbA is a multidrug resistance transporter homolog from E. coli and belongs to a superfamily of transporters that contain an adenosine triphosphate (ATP) binding cassette (ABC) which is also called a nucleotide-binding domain (NBD). MsbA is a member of the MDR-ABC transporter group by sequence homology. MsbA transports lipid A, a major component of the bacterial outer cell membrane, and is the on…
ARO:3003952	0.391954964	0	0.801201429	1.982710432	1.676865072	1.917641392	2.552282736	0.23416964	1.060538698	1.94547254	0.840043021	0.7843502	YojI	YojI mediates resistance to the peptide antibiotic microcin J25 when it is expressed from a multicopy vector. YojI is capable of pumping out microcin molecules. The outer membrane protein TolC in addition to YojI is required for export of microcin J25 out of the cell. Microcin J25 is thus the first known substrate for YojI.
ARO:3003953	0	0.129829247	0	0.791199791	0.378635476	1.165855642	0.731500986	0	0.85128396	0.298417231	0.393457309	0.302998096	hmrM	hmrM is a multidrug efflux pump belonging to the MATE family and functions as a Na+/drug antiporter.
ARO:3003954	0	0	0	0.207899888	0.417867586	0.428885047	1.00911883	0	0.402638265	0.922145199	0.477647692	0.44585744	efmA	efmA is an MFS transporter permease in E. faecium.
ARO:3003962	2.935301488	1.00583249	2.402928355	99.1590342	101.2907371	101.3623542	106.4575609	21.78361748	104.4254604	90.36299506	95.11610367	85.3222835	farB	farB is the cytoplasmic transporter protein that is part of the farAB efflux pump.
ARO:3003967	2.967882098	1.750826638	2.002460666	66.49057457	68.21291886	72.1092226	64.83739484	18.88498112	66.05757747	34.72680923	39.68066762	33.0787568	lrfA	lfrA is involved in the active efflux of quinolones and is found in Mycobacterium smegmatis.
